# Supplementary material
Source: publisher figshare collection journal article supplement (https://geolsoc.figshare.com/ndownloader/files/16806005)
Supplement: Supplementary file 1 [file 16806005]

## Sheet: LA-ICP-MS results
Enti-4
				Isotope ratios						Ages (Ma)						Data filter A*	Data filter B#	quoted age	±2σ	* Data filter A: Percentages calculated from [100 x (206Pb/238U age / 207Pb/235U age)].
#	Spot	U [ppm]	ƒ206%	206Pb/238U	±2σ	207Pb/235U	±2σ	207Pb/206Pb	±2σ	206Pb/238U	±2σ	207Pb/235U	±2σ	207Pb/206Pb	±2σ					# Data filter B: Concordance calculated from [100 x (206Pb/238U age / 207Pb/206Pb age)].
17	Enti-4-17	1477.98	4.45419	0.0244844	0.00110219	0.216268	0.013026	0.064062	0.00256352	155.931	6.93514	198.799	10.875	743.756	84.6863	78.4363	20.9653	-	-	grains younger than 1200 Ma are quoted by their 206Pb/238U age, for those older than 1200 Ma the 207Pb/206Pb age is used
15	Enti-4-15	1542.92	4.60665	0.0329564	0.00116043	0.303402	0.0145024	0.0667694	0.00215837	209.018	7.24174	269.054	11.2982	830.665	67.4391	77.6863	25.1627	-	-
4	Enti-4-04	1164.17	bd	0.0881498	0.00132022	0.71504	0.0284367	0.0588312	0.00216743	544.568	7.82101	547.734	16.8374	560.927	80.3566	99.4219	97.0835	544.568	7.82101
47	Enti-4-47	490.689	bd	0.0915259	0.00171891	0.752535	0.0182465	0.0596322	0.000914523	564.537	10.1514	569.694	10.5721	590.329	33.2594	99.0948	95.6309	564.537	10.1514
18	Enti-4-18	221.889	0.362586	0.0919838	0.00261729	0.746957	0.0273587	0.0588957	0.00135832	567.24	15.4504	566.457	15.903	563.312	50.2586	100.138	100.697	567.24	15.4504
8	Enti-4-08	78.288	0.417272	0.0928667	0.00227777	0.806575	0.0359284	0.0629917	0.00234226	572.451	13.4353	600.531	20.1962	708.022	79.1454	95.3241	80.8521	572.451	13.4353
3	Enti-4-03	131.1	0.124564	0.0933403	0.00181629	0.75682	0.0273652	0.0588061	0.00179216	575.243	10.7087	572.174	15.8175	559.993	66.4616	100.536	102.723	575.243	10.7087
40	Enti-4-40	571.075	bd	0.095743	0.00193036	0.807592	0.0191536	0.0611763	0.000764074	589.394	11.3562	601.102	10.7596	645.509	26.8412	98.0522	91.3069	589.394	11.3562
51	Enti-4-51	434.686	bd	0.0965834	0.00205583	0.871745	0.0227358	0.0654615	0.00098657	594.336	12.0851	636.514	12.3343	789.275	31.6381	93.3735	75.3015	594.336	12.0851
33	Enti-4-33	77.4458	bd	0.0967327	0.0043895	0.81144	0.0488206	0.060839	0.00240352	595.213	25.8001	603.262	27.3725	633.616	85.1345	98.6659	93.9391	595.213	25.8001
37	Enti-4-37	336.976	bd	0.0997749	0.00397707	0.834411	0.0368634	0.0606537	0.0011555	613.07	23.3112	616.057	20.4074	627.046	41.07	99.5152	97.7712	613.07	23.3112
44	Enti-4-44	286.127	bd	0.100421	0.0035723	0.881536	0.0351144	0.0636669	0.0011411	616.856	20.9264	641.812	18.9519	730.653	37.9801	96.1117	84.4253	616.856	20.9264
35	Enti-4-35	95.0954	bd	0.102595	0.00422189	0.893063	0.045251	0.0631329	0.00186641	629.577	24.6829	648.014	24.2759	712.781	62.8567	97.1549	88.3269	629.577	24.6829
54	Enti-4-54	245.045	bd	0.104278	0.00256129	0.868982	0.0266948	0.0604391	0.00111508	639.409	14.9516	635.014	14.5038	619.407	39.8254	100.692	103.229	639.409	14.9516
9	Enti-4-09	14.0835	3.96794	0.104854	0.00504571	0.395378	0.122813	0.027348	0.00839233	642.772	29.4391	338.29	89.5999	-	-	190.006	-	-	-
11	Enti-4-11	371.158	0.242602	0.104879	0.00300128	0.874205	0.0310963	0.0604535	0.00127726	642.92	17.5105	637.848	16.8485	619.922	45.6047	100.795	103.71	642.92	17.5105
21	Enti-4-21	643.529	0.1203	0.104902	0.0023094	0.857252	0.02398	0.0592687	0.00102286	643.05	13.4735	628.622	13.1109	577.054	37.5128	102.295	111.437	643.05	13.4735
25	Enti-4-25	534.652	bd	0.109631	0.00270129	0.909884	0.0291645	0.0601939	0.00123401	670.581	15.6927	656.996	15.5064	610.623	44.3172	102.068	109.819	670.581	15.6927
1	Enti-4-01	306.594	bd	0.110826	0.0022397	0.947581	0.0277138	0.0620115	0.00131103	677.523	12.9971	676.842	14.4497	674.577	45.2185	100.101	100.437	677.523	12.9971
49	Enti-4-49	94.8699	bd	0.110966	0.00262864	0.943064	0.0389777	0.061638	0.0020876	678.336	15.2523	674.484	20.3712	661.645	72.6271	100.571	102.523	678.336	15.2523
27	Enti-4-27	169.418	0.0270855	0.111359	0.00278253	0.932108	0.0317974	0.0607069	0.00140989	680.616	16.1395	668.743	16.712	628.943	50.0584	101.775	108.216	680.616	16.1395
13	Enti-4-13	304.903	bd	0.11328	0.00365018	1.00445	0.0375089	0.0643088	0.00121371	691.748	21.1356	706.065	19.0029	751.872	39.8588	97.9724	92.0035	691.748	21.1356
7	Enti-4-07	162.935	0.232936	0.113875	0.00231568	0.963276	0.0296144	0.0613509	0.00141458	695.19	13.4013	684.992	15.3174	651.631	49.5052	101.489	106.685	695.19	13.4013
22	Enti-4-22	384.522	bd	0.113909	0.00252387	0.980284	0.0272042	0.0624156	0.00104294	695.386	14.6057	693.75	13.9497	688.453	35.6579	100.236	101.007	695.386	14.6057
14	Enti-4-14	494.008	0.223108	0.114888	0.00266216	0.988143	0.0282859	0.0623796	0.00104842	701.052	15.3925	697.772	14.4471	687.222	35.8725	100.47	102.012	701.052	15.3925
46	Enti-4-46	107.144	bd	0.115204	0.00243739	0.998071	0.0289508	0.0628334	0.00124684	702.88	14.0888	702.83	14.7133	702.672	42.2478	100.007	100.03	702.88	14.0888
53	Enti-4-53	288.415	bd	0.116614	0.0023585	1.01339	0.0288956	0.0630267	0.00126681	711.024	13.6156	710.586	14.5735	709.205	42.7485	100.062	100.256	711.024	13.6156
50	Enti-4-50	233.688	bd	0.117095	0.00240939	1.01287	0.0276724	0.0627359	0.00112756	713.798	13.9034	710.325	13.9601	699.363	38.2853	100.489	102.064	713.798	13.9034
38	Enti-4-38	103.625	bd	0.118327	0.00482323	1.02982	0.0501772	0.0631211	0.00168492	720.906	27.802	718.837	25.1054	712.39	56.7484	100.288	101.195	720.906	27.802
43	Enti-4-43	198.352	bd	0.119188	0.00221745	1.02184	0.0272239	0.0621797	0.00118577	725.863	12.7719	714.836	13.6729	680.366	40.7505	101.543	106.687	725.863	12.7719
32	Enti-4-32	128.844	bd	0.12053	0.00468708	1.08996	0.0474204	0.0655861	0.00127955	733.591	26.9641	748.483	23.0427	793.271	40.9317	98.0104	92.4767	733.591	26.9641
16	Enti-4-16	120.056	bd	0.126261	0.00348871	1.1248	0.0402581	0.0646108	0.00146988	766.476	19.9678	765.273	19.2405	761.762	47.9746	100.157	100.619	766.476	19.9678
5	Enti-4-05	302.707	0.403573	0.129819	0.00373254	1.18785	0.0388458	0.0663623	0.00103405	786.807	21.2961	794.962	18.0303	817.895	32.5584	98.9741	96.199	786.807	21.2961
26	Enti-4-26	389.696	bd	0.134731	0.00325645	1.18998	0.0359291	0.0640577	0.00115912	814.772	18.4994	795.952	16.66	743.613	38.271	102.364	109.569	814.772	18.4994
2	Enti-4-02	372.001	0.25118	0.135204	0.00216022	1.22725	0.0291773	0.0658328	0.00115901	817.459	12.2667	813.087	13.3024	801.139	36.8881	100.538	102.037	817.459	12.2667
23	Enti-4-23	65.4651	bd	0.142734	0.00389586	1.30229	0.0478759	0.0661728	0.00162967	860.076	21.9768	846.732	21.1178	811.915	51.5223	101.576	105.932	860.076	21.9768
45	Enti-4-45	109.097	bd	0.145244	0.00309175	1.37014	0.0390767	0.068417	0.00129864	874.222	17.4025	876.224	16.7422	881.286	39.2723	99.7716	99.1985	874.222	17.4025
20	Enti-4-20	62.369	0.194609	0.146973	0.00408353	1.38243	0.0566872	0.0682188	0.00205732	883.946	22.9503	881.476	24.1644	875.278	62.4704	100.28	100.99	883.946	22.9503
34	Enti-4-34	113.727	bd	0.158269	0.00643392	1.54813	0.0717289	0.0709433	0.00157701	947.119	35.8076	949.749	28.5902	955.853	45.4617	99.723	99.0862	947.119	35.8076
31	Enti-4-31	538.247	bd	0.165358	0.00733866	1.55693	0.0749195	0.0682876	0.00127007	986.454	40.5945	953.249	29.7598	877.366	38.5046	103.483	112.434	986.454	40.5945
12	Enti-4-12	285.144	0.0627499	0.168596	0.0070657	1.95188	0.113925	0.0839663	0.00341105	1004.34	38.9763	1099.09	39.2072	1291.84	79.1073	91.3787	77.7446	1004.34	38.9763
39	Enti-4-39	175.449	bd	0.171658	0.00662307	1.73089	0.0729009	0.0731316	0.00123513	1021.21	36.4391	1020.08	27.112	1017.67	34.2131	100.11	100.347	1021.21	36.4391
42	Enti-4-42	177.646	bd	0.172899	0.0034404	1.68963	0.0461958	0.0708759	0.00132894	1028.03	18.9084	1004.62	17.4414	953.908	38.3568	102.33	107.77	1028.03	18.9084
48	Enti-4-48	134.473	bd	0.177551	0.003558	1.79712	0.048399	0.0734096	0.00132082	1053.55	19.4774	1044.41	17.5711	1025.35	36.4065	100.875	102.75	1053.55	19.4774
36	Enti-4-36	86.2964	bd	0.182615	0.00700782	1.86127	0.0792028	0.0739215	0.00135931	1081.21	38.1987	1067.44	28.114	1039.4	37.1313	101.29	104.023	1081.21	38.1987
24	Enti-4-24	86.8394	bd	0.185159	0.00632775	1.89982	0.0898618	0.0744159	0.00243353	1095.06	34.4177	1081.02	31.4756	1052.84	65.9227	101.298	104.01	1095.06	34.4177
52	Enti-4-52	421.242	bd	0.193065	0.00418095	1.9838	0.0482999	0.0745232	0.000829251	1137.92	22.59	1110.01	16.4378	1055.74	22.4113	102.514	107.784	1137.92	22.59
28	Enti-4-28	1079.27	0.270789	0.20262	0.00622548	3.21334	0.115223	0.11502	0.00212631	1189.34	33.3697	1460.38	27.7747	1880.27	33.3118	81.4404	63.2537	-	-
29	Enti-4-29	297.906	0.0739943	0.332664	0.0114712	7.17239	0.292649	0.156371	0.00341074	1851.22	55.4884	2133.08	36.3759	2416.86	37.0312	86.7864	76.596	-	-
19	Enti-4-19	20.9702	0.17464	0.335827	0.00899786	5.10152	0.195172	0.110175	0.00300876	1866.5	43.421	1836.36	32.4907	1802.36	49.6864	101.641	103.559	1802.36	49.6864
6	Enti-4-06	290.901	0.0164805	0.361022	0.00496043	6.10623	0.109695	0.12267	0.00141965	1986.95	23.4942	1991.14	15.6751	1995.48	20.5708	99.7897	99.5724	1995.48	20.5708
10	Enti-4-10	113.408	bd	0.374136	0.00530522	6.35612	0.113889	0.123214	0.00134966	2048.77	24.8874	2026.23	15.7216	2003.35	19.4502	101.112	102.267	2003.35	19.4502
30	Enti-4-30	108.006	bd	0.483415	0.0182237	10.7151	0.427133	0.160758	0.00208318	2542.04	79.1953	2498.73	37.0374	2463.72	21.8916	101.733	103.179	2463.72	21.8916
41	Enti-4-41	612.203	bd	-	-	-	-	0.0730629	0.00199297	-	-	-	-	1015.77	55.2845	-	-	-	-
Enti-6
				Isotope ratios						Ages (Ma)						Data filter A*	Data filter B#	quoted age	±2σ
#	Spot	U [ppm]	ƒ206%	206Pb/238U	±2σ	207Pb/235U	±2σ	207Pb/206Pb	±2σ	206Pb/238U	±2σ	207Pb/235U	±2σ	207Pb/206Pb	±2σ
6	Enti-6-06	1735.79	8.94549	0.014427	0.000708702	0.136393	0.00744858	0.0685672	0.00163596	92.335	4.50347	129.827	6.65551	885.816	49.3288	71.1218	10.4237	-	-
31	Enti-6-31	426.96	3.00699	0.0533517	0.00216134	0.356358	0.0531067	0.0484437	0.00694752	335.056	13.2268	309.492	39.7766	121.074	214.062	108.26	276.737	-	-
67	Enti-6-67	598.108	0.839119	0.0597081	0.00229755	0.522426	0.0229026	0.0634586	0.00133289	373.838	13.976	426.771	15.2761	723.71	44.5652	87.5969	51.6558	-	-
79	Enti-6-79	1378.14	5.14338	0.0616389	0.00184945	0.561434	0.0505316	0.0660607	0.00560564	385.572	11.2298	452.46	32.8716	808.368	178.289	85.2169	47.6976	-	-
32	Enti-6-32	111.909	1.53711	0.0745413	0.00245155	0.597089	0.0300575	0.0580952	0.00221409	463.443	14.7069	475.384	19.112	533.423	83.518	97.488	86.8809	-	-
28	Enti-6-28	724.945	0.427107	0.0770108	0.00254643	0.844748	0.031719	0.0795563	0.00141543	478.241	15.2411	621.763	17.4604	1186.08	35.1477	76.9169	40.3211	-	-
45	Enti-6-45	186.048	1.13205	0.0858239	0.00251011	0.673524	0.0331139	0.0569172	0.00224935	530.775	14.9018	522.853	20.0939	488.4	87.285	101.515	108.676	530.775	14.9018
36	Enti-6-36	489.982	0.193816	0.0918367	0.00232208	0.751346	0.0229559	0.0593366	0.00101768	566.372	13.7096	569.005	13.31	579.543	37.2696	99.5373	97.7274	566.372	13.7096
70	Enti-6-70	61.6962	1.98385	0.0926221	0.00320446	0.749525	0.0553427	0.0586909	0.0038284	571.008	18.9056	567.949	32.1303	555.72	142.646	100.539	102.751	571.008	18.9056
18	Enti-6-18	194.653	1.72565	0.093592	0.0034043	0.767335	0.0422503	0.0594627	0.00245795	576.727	20.0668	578.233	24.2786	584.149	89.8218	99.7397	98.7295	576.727	20.0668
26	Enti-6-26	422.39	bd	0.0941057	0.00234796	0.766323	0.0243424	0.0590602	0.00116112	579.754	13.8336	577.651	13.9943	569.386	42.7961	100.364	101.821	579.754	13.8336
15	Enti-6-15	375.496	0.0891944	0.0947024	0.00306894	0.7846	0.0287754	0.0600878	0.0010319	583.269	18.0716	588.104	16.3738	606.809	37.1456	99.1778	96.1207	583.269	18.0716
71	Enti-6-71	233.779	bd	0.0949912	0.00293314	0.769579	0.0285692	0.0587582	0.00121087	584.97	17.2674	579.522	16.3944	558.219	44.9467	100.94	104.792	584.97	17.2674
17	Enti-6-17	408.02	0.087501	0.0983369	0.00295354	0.805849	0.0265951	0.0594341	0.000812908	604.635	17.3346	600.123	14.9548	583.11	29.6974	100.752	103.692	604.635	17.3346
24	Enti-6-24	538.266	0.839703	0.100172	0.002526	0.931211	0.0280785	0.0674215	0.00111462	615.4	14.8006	668.271	14.764	850.892	34.3657	92.0883	72.3241	615.4	14.8006
19	Enti-6-19	204.714	bd	0.100463	0.00343139	0.815128	0.0340316	0.0588465	0.00141285	617.099	20.1002	605.327	19.0395	561.49	52.3376	101.945	109.904	617.099	20.1002
77	Enti-6-77	719.596	1.75982	0.102903	0.00292079	0.896887	0.0348131	0.0632134	0.00167365	631.378	17.0714	650.062	18.6372	715.489	56.262	97.1257	88.2442	631.378	17.0714
74	Enti-6-74	152.08	bd	0.103351	0.00306623	0.844939	0.0307931	0.0592937	0.00125499	633.998	17.9141	621.867	16.9489	577.97	46.0052	101.951	109.694	633.998	17.9141
40	Enti-6-40	206.787	0.501414	0.104113	0.00209959	0.871233	0.0238776	0.0606918	0.00112638	638.445	12.2582	636.237	12.9574	628.4	39.9971	100.347	101.599	638.445	12.2582
57	Enti-6-57	79.8822	bd	0.104492	0.00308233	0.851894	0.0337546	0.0591289	0.00156422	640.661	17.9896	625.688	18.5095	571.923	57.5686	102.393	112.019	640.661	17.9896
42	Enti-6-42	41.9414	0.0950758	0.105216	0.00297794	0.891051	0.0395115	0.0614214	0.00209662	644.883	17.369	646.934	21.2184	654.101	73.2946	99.683	98.5907	644.883	17.369
4	Enti-6-04	248.063	bd	0.105507	0.00333716	0.849744	0.0313351	0.0584123	0.00110736	646.582	19.459	624.508	17.2025	545.335	41.4324	103.535	118.566	646.582	19.459
14	Enti-6-14	462.772	0.0584633	0.106936	0.00350506	0.9076	0.0340484	0.0615556	0.00112333	654.91	20.4117	655.781	18.1253	658.774	39.134	99.8672	99.4134	654.91	20.4117
5	Enti-6-05	179.605	0.669367	0.107108	0.00365423	0.901335	0.0381756	0.0610327	0.00153181	655.91	21.2771	652.441	20.3899	640.464	53.997	100.532	102.412	655.91	21.2771
39	Enti-6-39	121.393	0.330552	0.107782	0.00282868	0.90734	0.0379717	0.0610554	0.00199026	659.83	16.4602	655.642	20.2171	641.255	70.138	100.639	102.897	659.83	16.4602
22	Enti-6-22	702.338	0.00265305	0.108162	0.00260856	0.918079	0.029694	0.0615609	0.00132674	662.041	15.1741	661.343	15.7205	658.965	46.2151	100.106	100.467	662.041	15.1741
27	Enti-6-27	173.733	bd	0.109446	0.0027759	0.925835	0.0313425	0.0613525	0.00137565	669.509	16.1288	665.441	16.5266	651.689	48.1415	100.611	102.734	669.509	16.1288
8	Enti-6-08	119.179	0.0639769	0.109709	0.0047157	0.948189	0.0653385	0.0626831	0.00337607	671.038	27.3933	677.159	34.0668	697.57	114.932	99.096	96.1965	671.038	27.3933
59	Enti-6-59	287.141	0.0983956	0.110165	0.003039	0.939324	0.0299108	0.0618401	0.000983603	673.685	17.6461	672.528	15.6618	668.654	34.0509	100.172	100.752	673.685	17.6461
34	Enti-6-34	165.644	0.0234265	0.110457	0.00225169	0.935318	0.0249571	0.0614136	0.00105736	675.38	13.0711	670.429	13.0947	653.825	36.9501	100.739	103.297	675.38	13.0711
52	Enti-6-52	403.848	0.01082	0.112377	0.00356629	0.958319	0.0328182	0.0618486	0.000796031	686.518	20.6667	682.425	17.0177	668.95	27.5517	100.6	102.626	686.518	20.6667
21	Enti-6-21	730.209	1.15231	0.112612	0.00265613	0.964927	0.0283574	0.0621456	0.00108946	687.875	15.389	685.846	14.6548	679.193	37.4651	100.296	101.278	687.875	15.389
60	Enti-6-60	242.236	0.781409	0.112667	0.00336418	0.97348	0.0377419	0.0626658	0.00154966	688.194	19.4903	690.256	19.4211	696.979	52.7096	99.7013	98.7396	688.194	19.4903
16	Enti-6-16	696.25	0.00628257	0.113928	0.00334969	0.973931	0.0324953	0.0620005	0.000977895	695.499	19.3844	690.488	16.717	674.195	33.7362	100.726	103.16	695.499	19.3844
82	Enti-6-82	294.949	bd	0.114535	0.00158249	0.957899	0.0220744	0.0606571	0.00111871	699.007	9.15275	682.207	11.4484	627.17	39.7587	102.463	111.454	699.007	9.15275
3	Enti-6-03	375.48	0.162687	0.115059	0.00392139	1.00269	0.0395699	0.0632045	0.00125746	702.037	22.6699	705.177	20.0649	715.194	42.2716	99.5548	98.1604	702.037	22.6699
76	Enti-6-76	101.318	0.615681	0.120101	0.00417289	1.05968	0.0470404	0.0639923	0.00176804	731.122	24.0152	733.667	23.194	741.448	58.465	99.6531	98.6073	731.122	24.0152
50	Enti-6-50	147.16	0.13246	0.120199	0.00356604	1.06328	0.0402067	0.0641574	0.00150421	731.686	20.5209	735.441	19.789	746.894	49.5672	99.4894	97.9638	731.686	20.5209
61	Enti-6-61	133.6	bd	0.120314	0.00354487	1.04851	0.040046	0.0632055	0.00153607	732.346	20.397	728.143	19.8521	715.222	51.6462	100.577	102.394	732.346	20.397
46	Enti-6-46	641.583	0.262108	0.12116	0.00295423	1.06674	0.0300442	0.0638551	0.00090016	737.216	16.9856	737.139	14.7617	736.909	29.8405	100.01	100.042	737.216	16.9856
1	Enti-6-01	13.5614	bd	0.125355	0.00600501	1.12538	0.0807554	0.0651113	0.00347872	761.288	34.398	765.549	38.5988	778.003	112.524	99.4434	97.8515	761.288	34.398
55	Enti-6-55	52.4844	1.98695	0.125578	0.00372631	1.01621	0.0547138	0.0586903	0.00263674	762.566	21.3407	712.004	27.5612	555.701	98.114	107.101	137.226	-	-
73	Enti-6-73	63.4514	bd	0.126489	0.0040373	1.13038	0.0497408	0.0648147	0.00196328	767.778	23.1031	767.936	23.7118	768.399	63.8247	99.9793	99.9191	767.778	23.1031
13	Enti-6-13	372.882	0.275323	0.127986	0.00405919	1.13276	0.0455966	0.0641912	0.00159108	776.338	23.1976	769.068	21.7113	748.01	52.3901	100.945	103.787	776.338	23.1976
23	Enti-6-23	340.575	0.340883	0.129195	0.00501498	1.16396	0.0529189	0.0653419	0.00154662	783.245	28.6291	783.815	24.8358	785.432	49.7246	99.9274	99.7216	783.245	28.6291
48	Enti-6-48	412.498	4.59963	0.131354	0.00255657	1.18333	0.0318458	0.0653374	0.00121436	795.561	14.5668	792.865	14.8113	785.289	39.0434	100.34	101.308	795.561	14.5668
43	Enti-6-43	387.812	0.0180157	0.132563	0.0031063	1.31624	0.0363156	0.0720132	0.00104888	802.443	17.6802	852.866	15.9212	986.381	29.645	94.0878	81.3522	802.443	17.6802
12	Enti-6-12	32.2945	bd	0.132582	0.00814895	1.12537	0.0967391	0.0615611	0.00369972	802.554	46.3814	765.542	46.2486	658.975	129.118	104.835	121.788	802.554	46.3814
69	Enti-6-69	52.0928	0.944497	0.134404	0.00484638	1.23321	0.0600456	0.0665459	0.00217737	812.915	27.5395	815.797	27.3078	823.665	68.3403	99.6467	98.6949	812.915	27.5395
80	Enti-6-80	418.619	0.120232	0.135856	0.00356065	1.18698	0.042302	0.063367	0.00153026	821.16	20.2075	794.558	19.6427	720.639	51.2695	103.348	113.949	821.16	20.2075
29	Enti-6-29	238.41	0.0276664	0.138459	0.00351902	1.26672	0.0416067	0.0663529	0.00138056	835.913	19.9255	830.923	18.6399	817.599	43.4828	100.601	102.24	835.913	19.9255
83	Enti-6-83	204.448	0.357211	0.139059	0.00194708	1.30727	0.0357528	0.0681816	0.0016018	839.311	11.019	848.928	15.7353	874.152	48.6612	98.8671	96.0143	839.311	11.019
62	Enti-6-62	130.488	bd	0.140842	0.00457754	1.29066	0.0520249	0.0664628	0.00158464	849.394	25.865	841.59	23.0651	821.061	49.8056	100.927	103.451	849.394	25.865
11	Enti-6-11	94.257	0.909955	0.145689	0.0044446	1.35321	0.0507387	0.0673652	0.00146847	876.725	25.0076	868.944	21.8966	849.156	45.3329	100.895	103.247	876.725	25.0076
37	Enti-6-37	220.193	bd	0.146128	0.00378381	1.26865	0.0398094	0.0629663	0.00111606	879.195	21.2815	831.789	17.8193	707.164	37.7083	105.699	124.327	879.195	21.2815
65	Enti-6-65	279.876	bd	0.146757	0.00432291	1.38698	0.0460521	0.0685442	0.00105026	882.732	24.3003	883.414	19.5922	885.129	31.6811	99.9227	99.7291	882.732	24.3003
51	Enti-6-51	203.186	bd	0.149976	0.00438083	1.43696	0.0490785	0.0694902	0.00122995	900.799	24.5569	904.456	20.4518	913.396	36.4351	99.5957	98.6209	900.799	24.5569
2	Enti-6-02	269.894	bd	0.15356	0.00479138	1.40219	0.0485033	0.0662259	0.000988919	920.861	26.7748	889.864	20.5046	813.594	31.2281	103.483	113.184	920.861	26.7748
64	Enti-6-64	72.0295	bd	0.154749	0.00466028	1.49653	0.054393	0.0701381	0.00142732	927.501	26.0154	928.974	22.1261	932.469	41.7662	99.8415	99.4672	927.501	26.0154
41	Enti-6-41	152.485	bd	0.156699	0.00417466	1.50067	0.0499808	0.0694573	0.00138829	938.374	23.2652	930.657	20.2971	912.423	41.151	100.829	102.844	938.374	23.2652
75	Enti-6-75	129.599	bd	0.159646	0.00517648	1.61084	0.0648744	0.0731801	0.00174808	954.776	28.7751	974.433	25.2356	1019.02	48.3847	97.9827	93.696	954.776	28.7751
81	Enti-6-81	107.348	0.155667	0.162022	0.00244829	1.57434	0.0410928	0.0704731	0.00149986	967.975	13.5817	960.141	16.2094	942.235	43.6163	100.816	102.732	967.975	13.5817
44	Enti-6-44	439.705	bd	0.163742	0.00364663	1.50656	0.0409952	0.0667305	0.00104337	977.505	20.1995	933.045	16.6083	829.444	32.6109	104.765	117.851	977.505	20.1995
56	Enti-6-56	391.244	0.697824	0.165877	0.00446285	1.76802	0.0539339	0.0773034	0.00111144	989.325	24.6755	1033.79	19.7869	1129.1	28.6388	95.6985	87.6208	989.325	24.6755
68	Enti-6-68	36.0679	bd	0.167464	0.00535001	1.63944	0.0662473	0.0710023	0.00175682	998.093	29.5405	985.498	25.4905	957.551	50.5972	101.278	104.234	998.093	29.5405
33	Enti-6-33	66.5656	0.24721	0.167859	0.00478458	1.67794	0.063211	0.0724987	0.00178575	1000.27	26.4095	1000.2	23.9719	1000.05	50.0393	100.007	100.023	1000.27	26.4095
72	Enti-6-72	604.142	0.0115909	0.169897	0.00678162	1.64681	0.0762706	0.0703003	0.00165124	1011.51	37.3676	988.329	29.2674	937.209	48.1796	102.345	107.928	1011.51	37.3676
38	Enti-6-38	186.376	0.304563	0.17128	0.00357412	1.66055	0.04332	0.0703141	0.0011009	1019.13	19.6704	993.585	16.5343	937.61	32.1054	102.571	108.694	1019.13	19.6704
85	Enti-6-85	175.658	0.138663	0.173542	0.00330192	1.73326	0.048774	0.0724367	0.00150181	1031.56	18.1373	1020.96	18.121	998.311	42.1286	101.038	103.331	1031.56	18.1373
58	Enti-6-58	524.664	0.472709	0.173797	0.00565249	1.667	0.0587783	0.0695649	0.000947446	1032.97	31.0423	996.043	22.3818	915.608	28.0237	103.707	112.817	1032.97	31.0423
49	Enti-6-49	295.874	bd	0.177947	0.00478076	1.64521	0.0504517	0.0670546	0.000991416	1055.72	26.1624	987.713	19.3686	839.543	30.7894	106.885	125.749	1055.72	26.1624
25	Enti-6-25	86.4299	bd	0.178672	0.00431967	1.80807	0.0580277	0.0733932	0.00154912	1059.68	23.6245	1048.38	20.9855	1024.9	42.7103	101.078	103.394	1059.68	23.6245
66	Enti-6-66	188.721	bd	0.180111	0.00521067	1.86345	0.0651699	0.0750372	0.00147449	1067.55	28.4628	1068.21	23.1133	1069.57	39.4964	99.9378	99.8108	1067.55	28.4628
35	Enti-6-35	61.9405	bd	0.180683	0.00497193	1.86857	0.0681236	0.075005	0.00179378	1070.67	27.1455	1070.02	24.1181	1068.7	48.0843	100.061	100.184	1070.67	27.1455
10	Enti-6-10	124.87	bd	0.184662	0.00602195	1.8169	0.070973	0.0713594	0.00153455	1092.36	32.7681	1051.57	25.5885	967.793	43.8976	103.879	112.871	1092.36	32.7681
53	Enti-6-53	58.4385	bd	0.310107	0.00861538	4.48291	0.142521	0.104845	0.00162054	1741.18	42.3914	1727.81	26.3996	1711.66	28.4338	100.774	101.725	1711.66	28.4338
30	Enti-6-30	289.735	0.00360838	0.312688	0.00912527	4.59999	0.152945	0.106695	0.00169987	1753.87	44.8121	1749.27	27.7387	1743.78	29.192	100.263	100.578	1743.78	29.192
9	Enti-6-09	189.759	0.0185174	0.33376	0.0115564	5.26565	0.195842	0.114424	0.00155375	1856.52	55.8547	1863.31	31.7476	1870.89	24.4904	99.6355	99.2317	1870.89	24.4904
47	Enti-6-47	204.8	bd	0.374358	0.00771863	6.68004	0.15848	0.129417	0.00151884	2049.81	36.2034	2069.99	20.9557	2090.13	20.6375	99.0253	98.0712	2090.13	20.6375
78	Enti-6-78	17.4787	bd	0.45208	0.010065	9.10553	0.294163	0.146079	0.00341963	2404.42	44.6822	2348.67	29.5653	2300.59	40.2308	102.374	104.513	2300.59	40.2308
54	Enti-6-54	74.0549	bd	0.478801	0.0218934	10.46	0.55781	0.158444	0.00434795	2521.96	95.4422	2476.38	49.4624	2439.19	46.4916	101.841	103.393	2439.19	46.4916
7	Enti-6-07	251.32	0.205549	0.484545	0.0204663	11.8295	0.519429	0.177065	0.00212465	2546.95	88.8745	2591	41.1323	2625.63	19.9556	98.2997	97.0033	2625.63	19.9556
20	Enti-6-20	112.153	0.00706718	0.50822	0.0115148	12.5208	0.33535	0.178681	0.00255215	2648.94	49.2156	2644.29	25.1893	2640.73	23.7179	100.176	100.311	2640.73	23.7179
84	Enti-6-84	558.597	0.0128453	0.513264	0.00860789	11.9974	0.248936	0.169529	0.00207121	2670.46	36.6683	2604.2	19.4498	2553.07	20.4563	102.544	104.598	2553.07	20.4563
63	Enti-6-63	39.7349	0.173774	0.530807	0.0154113	12.0644	0.419738	0.164843	0.00316	2744.76	64.899	2609.43	32.6338	2506.01	32.2533	105.186	109.527	2506.01	32.2533
E-Enti-12
				Isotope ratios						Ages (Ma)						Data filter A*	Data filter B#	quoted age	±2σ
#	Spot	U [ppm]	ƒ206%	206Pb/238U	±2σ	207Pb/235U	±2σ	207Pb/206Pb	±2σ	206Pb/238U	±2σ	207Pb/235U	±2σ	207Pb/206Pb	±2σ
32	Enti-12-32	2108.67	2.45474	0.015367	0.000450984	0.129908	0.00588136	0.0613121	0.00211361	98.3053	2.86314	124.015	5.28529	650.277	74.0623	79.2689	15.1175	-	-
31	Enti-12-31	3066.76	3.57321	0.0250365	0.000593227	0.21016	0.00791885	0.0608801	0.00178365	159.403	3.73066	193.687	6.6444	635.076	63.0951	82.2994	25.0999	-	-
41	Enti-12-41	2383.32	4.30746	0.0339641	0.000687909	0.302354	0.01534	0.0645645	0.00300335	215.304	4.28874	268.237	11.9604	760.245	98.2141	80.2663	28.3203	-	-
75	Enti-12-75	3275.06	4.41253	0.0427861	0.00112527	0.379226	0.0194374	0.0642827	0.00282802	270.071	6.95608	326.468	14.3107	751.014	93.0119	82.7249	35.9608	-	-
25	Enti-12-25	599.096	1.08987	0.0430875	0.00405034	0.429233	0.0416453	0.0722504	0.00173539	271.934	25.0309	362.632	29.5949	993.075	48.8472	74.989	27.383	-	-
27	Enti-12-27	38.4544	1.91041	0.0540979	0.00231513	0.746356	0.06461	0.100061	0.00752952	339.62	14.1579	566.108	37.5833	1625.29	140.343	59.9922	20.896	-	-
69	Enti-12-69	1680.35	2.04395	0.0630098	0.00167463	0.573035	0.0220347	0.0659587	0.00183295	393.891	10.1551	459.975	14.2242	805.135	58.2027	85.633	48.9223	-	-
38	Enti-12-38	335.636	0.0268502	0.0763159	0.00205809	0.686032	0.0220403	0.0651971	0.00113841	474.08	12.3262	530.414	13.2742	780.778	36.7022	89.3793	60.7189	-	-
45	Enti-12-45	154.656	0.0933041	0.0806276	0.00180146	0.649352	0.024305	0.0584111	0.00175405	499.852	10.7462	508.08	14.9638	545.287	65.6557	98.3805	91.6676	499.852	10.7462
47	Enti-12-47	69.2654	1.55334	0.0840486	0.00318331	0.697908	0.0914395	0.0602236	0.00755358	520.226	18.9294	537.54	54.7356	611.691	273.571	96.779	85.0472	520.226	18.9294
35	Enti-12-35	222.806	bd	0.0853304	0.00194377	0.683521	0.0208671	0.0580961	0.00118082	527.844	11.5448	528.9	12.5862	533.462	44.5175	99.8002	98.9469	527.844	11.5448
74	Enti-12-74	116.188	0.902605	0.0884824	0.00267565	0.739099	0.031346	0.0605821	0.00180152	546.538	15.8458	561.88	18.3035	624.499	64.1537	97.2696	87.5162	546.538	15.8458
20	Enti-12-20	341.117	0.12059	0.0896913	0.00212836	0.840486	0.0244358	0.067964	0.00114163	553.693	12.5906	619.414	13.4819	867.524	34.8234	89.3899	63.8246	-	-
13	Enti-12-13	48.991	0.777993	0.0897122	0.00242022	0.744476	0.031329	0.0601864	0.00194384	553.817	14.3169	565.014	18.2372	610.356	69.8471	98.0182	90.7366	553.817	14.3169
36	Enti-12-36	409.634	0.0425592	0.0903203	0.00158191	0.734248	0.0176042	0.0589598	0.000965367	557.413	9.3526	559.043	10.3074	565.686	35.6579	99.7084	98.5375	557.413	9.3526
51	Enti-12-51	128.925	0.549969	0.0911517	0.00237989	0.73319	0.0256509	0.0583378	0.00135852	562.327	14.0597	558.424	15.0286	542.55	50.9262	100.699	103.645	562.327	14.0597
37	Enti-12-37	215.447	0.310873	0.0917876	0.00187949	0.75905	0.0222404	0.059977	0.00125697	566.082	11.097	573.462	12.8386	602.822	45.3663	98.7132	93.9054	566.082	11.097
28	Enti-12-28	1841.64	0.485133	0.0920646	0.00319705	1.58237	0.058948	0.124657	0.00168111	567.717	18.8715	963.303	23.1823	2023.99	23.8895	58.9345	28.0494	-	-
60	Enti-12-60	313.967	0.386486	0.0927808	0.00303491	0.758088	0.0290492	0.0592598	0.00118277	571.944	17.9027	572.906	16.7789	576.73	43.3922	99.832	99.1701	571.944	17.9027
43	Enti-12-43	1308.6	1.09556	0.0938171	0.00267868	0.773102	0.0273053	0.0597659	0.00124253	578.054	15.7863	581.541	15.6379	595.183	45.0611	99.4003	97.122	578.054	15.7863
78	Enti-12-78	26.4623	bd	0.0968399	0.00368851	0.788838	0.0490023	0.0590789	0.00289914	595.844	21.6777	590.512	27.8217	570.073	106.936	100.903	104.521	595.844	21.6777
26	Enti-12-26	44.2167	0.134509	0.0968891	0.00267621	0.806578	0.03742	0.0603768	0.00225054	596.133	15.7276	600.533	21.0348	617.175	80.5378	99.2674	96.5906	596.133	15.7276
52	Enti-12-52	189.473	0.0851363	0.0971485	0.00391371	0.867418	0.0503297	0.0647577	0.0027041	597.657	22.9948	634.164	27.3727	766.549	88.0527	94.2432	77.9672	597.657	22.9948
58	Enti-12-58	387.443	0.00665124	0.0974708	0.00319035	0.804822	0.0299581	0.0598858	0.00106157	599.55	18.7392	599.545	16.8558	599.523	38.3902	100.001	100.005	599.55	18.7392
73	Enti-12-73	249.483	0.0586044	0.097816	0.00264361	0.808298	0.0271489	0.0599323	0.0011952	601.577	15.5229	601.499	15.2456	601.201	43.1776	100.013	100.063	601.577	15.5229
66	Enti-12-66	161.43	0.29472	0.0988489	0.00318911	0.821273	0.0318289	0.060258	0.00129397	607.64	18.7084	608.758	17.7468	612.922	46.4058	99.8163	99.1383	607.64	18.7084
61	Enti-12-61	164.554	bd	0.0992192	0.00340218	0.814926	0.0326508	0.0595692	0.00123454	609.812	19.9517	605.214	18.2689	588.031	44.9705	100.76	103.704	609.812	19.9517
3	Enti-12-03	228.106	0.134649	0.100186	0.00273018	0.912368	0.0313503	0.0660482	0.00138242	615.48	15.9967	658.315	16.6471	807.977	43.807	93.4932	76.1755	615.48	15.9967
42	Enti-12-42	2432.83	1.09189	0.100976	0.00794851	1.51748	0.121483	0.108994	0.00158932	620.107	46.5393	937.459	49.0362	1782.73	26.5884	66.1477	34.7842	-	-
44	Enti-12-44	197.618	bd	0.101306	0.00295727	0.894642	0.0324074	0.0640491	0.00137374	622.038	17.3096	648.86	17.3696	743.327	45.3663	95.8662	83.6829	622.038	17.3096
68	Enti-12-68	371.871	0.137942	0.101647	0.00323953	0.853277	0.0306723	0.0608826	0.00101226	624.035	18.9559	626.446	16.8064	635.161	35.7962	99.6152	98.2483	624.035	18.9559
64	Enti-12-64	372.183	0.0649648	0.101717	0.00329242	0.849775	0.0323471	0.0605912	0.00121374	624.442	19.2642	624.526	17.7579	624.824	43.2014	99.9867	99.939	624.442	19.2642
48	Enti-12-48	618.679	0.194448	0.10218	0.0023319	0.880795	0.032241	0.0625186	0.00178923	627.149	13.6384	641.412	17.4076	691.972	61.0542	97.7764	90.6322	627.149	13.6384
71	Enti-12-71	202.523	0.0647964	0.102445	0.00274623	0.86269	0.0287008	0.0610751	0.00120337	628.699	16.0578	631.59	15.6465	641.952	42.3717	99.5423	97.9356	628.699	16.0578
40	Enti-12-40	177.344	bd	0.102448	0.00190838	0.868458	0.0263107	0.0614815	0.00146893	628.719	11.1586	634.73	14.299	656.19	51.2648	99.053	95.8136	628.719	11.1586
10	Enti-12-10	161.989	0.0162237	0.102929	0.00321687	0.866891	0.0353429	0.0610837	0.00159918	631.531	18.8015	633.878	19.2249	642.257	56.3049	99.6297	98.3299	631.531	18.8015
82	Enti-12-82	647.437	0.0460196	0.103713	0.00242375	0.873503	0.0283598	0.0610845	0.0013767	636.11	14.1559	637.468	15.3714	642.285	48.4657	99.787	99.0386	636.11	14.1559
30	Enti-12-30	468.039	bd	0.105191	0.00217244	0.899337	0.0233617	0.0620073	0.000977013	644.738	12.6711	651.373	12.4898	674.434	33.7029	98.9813	95.5969	644.738	12.6711
21	Enti-12-21	309.044	0.199232	0.105905	0.00207889	0.894666	0.0231211	0.0612695	0.00102989	648.899	12.1176	648.873	12.3916	648.78	36.1061	100.004	100.018	648.899	12.1176
14	Enti-12-14	162.65	bd	0.10612	0.00301935	0.90987	0.030137	0.0621845	0.00105448	650.153	17.5961	656.989	16.0236	680.528	36.2301	98.9595	95.5366	650.153	17.5961
76	Enti-12-76	264.814	bd	0.106692	0.00321501	0.956886	0.0344422	0.0650469	0.00128052	653.488	18.7267	681.682	17.8731	775.924	41.4181	95.864	84.2206	653.488	18.7267
18	Enti-12-18	187.081	0.171322	0.1089	0.00314517	1.00334	0.047333	0.0668217	0.00249255	666.335	18.2834	705.502	23.995	832.295	77.8198	94.4483	80.0599	666.335	18.2834
22	Enti-12-22	141.759	bd	0.111249	0.00318264	1.04635	0.037289	0.068215	0.00144959	679.975	18.4621	727.072	18.5046	875.163	44.0121	93.5223	77.6969	679.975	18.4621
84	Enti-12-84	114.188	0.0625464	0.111792	0.00295366	0.957465	0.0380435	0.062117	0.0018434	683.126	17.1255	681.983	19.7365	678.21	63.4527	100.168	100.725	683.126	17.1255
23	Enti-12-23	152.519	bd	0.112368	0.00232398	0.976012	0.0264212	0.0629959	0.00110031	686.462	13.4676	691.558	13.5775	708.165	37.1552	99.2632	96.9354	686.462	13.4676
80	Enti-12-80	459.639	bd	0.113131	0.0027572	0.986329	0.0333953	0.0632323	0.00148615	690.883	15.9671	696.845	17.0728	716.128	49.9344	99.1444	96.4747	690.883	15.9671
16	Enti-12-16	109.751	0.274113	0.114651	0.00499518	1.23904	0.0737697	0.0783802	0.00318047	699.678	28.8881	818.446	33.466	1156.6	80.5712	85.4886	60.4943	-	-
12	Enti-12-12	53.192	1.17336	0.114847	0.00373712	0.94933	0.0550038	0.0599509	0.00287399	700.814	21.6086	677.754	28.6585	601.878	103.903	103.402	116.438	700.814	21.6086
81	Enti-12-81	281.389	0.511225	0.117577	0.00303367	1.12323	0.0425822	0.0692858	0.00192446	716.58	17.4983	764.52	20.3666	907.331	57.2443	93.7293	78.9767	716.58	17.4983
2	Enti-12-02	134.278	0.263775	0.119345	0.00340209	1.04887	0.0410084	0.0637408	0.0017056	726.767	19.5924	728.322	20.3257	733.113	56.6959	99.7865	99.1343	726.767	19.5924
39	Enti-12-39	468.91	0.59462	0.120331	0.00246444	1.20215	0.0312863	0.072457	0.00116352	732.445	14.18	801.579	14.4267	998.874	32.6204	91.3753	73.3271	732.445	14.18
50	Enti-12-50	62.7644	0.41318	0.124553	0.00340619	1.18647	0.0481459	0.0690878	0.00207123	756.694	19.5252	794.324	22.3622	901.437	61.8505	95.2626	83.9431	756.694	19.5252
5	Enti-12-05	77.477	0.447848	0.12886	0.00336437	1.15594	0.0436336	0.0650603	0.00177365	781.333	19.2118	780.044	20.553	776.353	57.3635	100.165	100.641	781.333	19.2118
53	Enti-12-53	532.384	0.00131905	0.133477	0.00665538	2.03398	0.105098	0.11052	0.0014979	807.642	37.8503	1126.95	35.1871	1808.05	24.6334	71.6663	44.6693	-	-
55	Enti-12-55	397.767	0.112558	0.134283	0.00339793	1.26275	0.0372905	0.0682019	0.00103833	812.227	19.3107	829.144	16.7351	874.763	31.5285	97.9597	92.8512	812.227	19.3107
77	Enti-12-77	144.398	0.0247558	0.134465	0.00332633	1.23213	0.0450448	0.0664579	0.00178891	813.263	18.9008	815.31	20.4934	820.899	56.2334	99.7489	99.0698	813.263	18.9008
83	Enti-12-83	63.4041	0.238315	0.137486	0.00396424	1.28684	0.0539578	0.0678836	0.00206658	830.403	22.4657	839.895	23.9623	865.073	63.1618	98.8699	95.9922	830.403	22.4657
24	Enti-12-24	111.538	bd	0.138824	0.00369069	1.59937	0.0778137	0.0835573	0.00340469	837.981	20.8909	969.965	30.4052	1282.33	79.4554	86.3929	65.3481	-	-
56	Enti-12-56	189.847	0.445301	0.143934	0.0040766	1.61878	0.0641723	0.0815686	0.00226248	866.841	22.9722	977.517	24.8866	1235.25	54.4262	88.6778	70.1753	-	-
54	Enti-12-54	195.025	0.886251	0.144978	0.00570564	1.37135	0.0630212	0.0686029	0.00162794	872.724	32.1229	876.74	26.9913	886.893	49.057	99.542	98.4024	872.724	32.1229
4	Enti-12-04	184.494	bd	0.14701	0.00530331	1.39709	0.0622582	0.0689248	0.00180325	884.151	29.8049	887.703	26.3779	896.564	54.0066	99.5999	98.6156	884.151	29.8049
33	Enti-12-33	93.0619	bd	0.148893	0.00414366	1.41582	0.0497523	0.0689652	0.00147971	894.729	23.2493	895.605	20.9142	897.765	44.2743	99.9021	99.6618	894.729	23.2493
62	Enti-12-62	53.1598	bd	0.159195	0.00618268	1.55999	0.0821344	0.071071	0.00252652	952.268	34.3818	954.464	32.5886	959.525	72.6938	99.77	99.2437	952.268	34.3818
15	Enti-12-15	241.614	0.0324454	0.164745	0.00437463	1.63636	0.0487845	0.0720388	0.000976348	983.06	24.2112	984.313	18.7913	987.105	27.5803	99.8727	99.5902	983.06	24.2112
59	Enti-12-59	305.448	0.368634	0.165289	0.00595389	1.63571	0.0663295	0.0717727	0.00133672	986.072	32.9363	984.059	25.5583	979.571	37.9515	100.205	100.664	986.072	32.9363
49	Enti-12-49	83.5265	0.533122	0.165919	0.00512763	1.7117	0.067655	0.0748222	0.00184364	989.555	28.3501	1012.92	25.3383	1063.8	49.5768	97.6932	93.0208	989.555	28.3501
11	Enti-12-11	161.93	0.106695	0.166683	0.00407745	1.67251	0.0469138	0.0727743	0.000998863	993.775	22.529	998.142	17.826	1007.74	27.8473	99.5625	98.614	993.775	22.529
63	Enti-12-63	194.438	bd	0.167588	0.00544365	1.67673	0.0620912	0.0725639	0.00129032	998.773	30.0544	999.743	23.5577	1001.87	36.1061	99.903	99.6911	998.773	30.0544
17	Enti-12-17	349.372	0.233713	0.172353	0.00421216	1.77301	0.0521956	0.074609	0.00122455	1025.03	23.1607	1035.62	19.1145	1058.06	33.0448	98.9771	96.8783	1025.03	23.1607
6	Enti-12-06	89.0328	0.250902	0.172363	0.00447299	1.80028	0.0679562	0.0757522	0.00207653	1025.08	24.5947	1045.56	24.6458	1088.6	54.9555	98.0416	94.1656	1025.08	24.5947
34	Enti-12-34	43.8108	bd	0.172478	0.00605619	1.7563	0.0833446	0.0738523	0.00235753	1025.72	33.2968	1029.49	30.7123	1037.51	64.497	99.6339	98.8637	1025.72	33.2968
1	Enti-12-01	58.7535	0.807196	0.176401	0.00635466	1.81852	0.0868295	0.0747679	0.00234311	1047.25	34.8213	1052.15	31.2906	1062.34	63.076	99.534	98.5792	1047.25	34.8213
8	Enti-12-08	85.2448	bd	0.179007	0.00459984	1.86148	0.0650535	0.07542	0.00178636	1061.51	25.1497	1067.51	23.0879	1079.78	47.5407	99.4381	98.308	1061.51	25.1497
29	Enti-12-29	437.409	0.0117421	0.179806	0.00409089	2.57598	0.070766	0.103905	0.00159974	1065.88	22.3518	1293.84	20.0963	1695.08	28.3813	82.381	62.8806	-	-
57	Enti-12-57	190.841	0.164183	0.182136	0.00431743	1.8935	0.0542444	0.0753991	0.00121295	1078.6	23.5431	1078.81	19.0376	1079.23	32.2866	99.9807	99.9417	1078.6	23.5431
85	Enti-12-85	1041.57	0.127677	0.202421	0.0123194	4.65322	0.299692	0.166723	0.00351347	1188.28	66.0467	1758.87	53.8787	2525.08	35.3956	67.559	47.059	-	-
46	Enti-12-46	497.74	0.0715642	0.297219	0.0045321	4.25348	0.212482	0.103793	0.00493749	1677.45	22.5213	1684.41	41.0905	1693.09	87.8048	99.5868	99.0761	1693.09	87.8048
9	Enti-12-09	245.091	6.72273	0.311797	0.0190619	4.98239	0.519084	0.115895	0.00977695	1749.49	93.6772	1816.34	88.3255	1893.91	152.259	96.3195	92.3746	1893.91	152.259
19	Enti-12-19	429.326	bd	0.366303	0.0103353	12.9871	0.406274	0.257141	0.00347392	2011.92	48.7629	2678.72	29.5014	3229.34	21.3146	75.1074	62.3012	-	-
79	Enti-12-79	145.423	0.0268314	0.366805	0.00904196	6.17797	0.20597	0.122154	0.00274198	2014.28	42.6449	2001.34	29.1441	1988	39.9399	100.647	101.322	1988	39.9399
65	Enti-12-65	709.174	0.0848005	0.380605	0.0128553	6.82366	0.252013	0.130029	0.00194255	2079.04	60.0244	2088.8	32.7185	2098.43	26.2451	99.5329	99.0759	2098.43	26.2451
67	Enti-12-67	229.09	bd	0.402614	0.0129926	7.74187	0.276144	0.139462	0.00211906	2181	59.7138	2201.48	32.0852	2220.61	26.3357	99.0697	98.2162	2220.61	26.3357
70	Enti-12-70	222.075	bd	0.524985	0.0154381	12.7667	0.424848	0.176372	0.00274746	2720.2	65.2599	2662.59	31.3453	2619.12	25.9209	102.164	103.859	2619.12	25.9209
7	Enti-12-07	236.11	0.00860291	0.528284	0.015577	13.2059	0.438907	0.181301	0.00278039	2734.13	65.705	2694.48	31.3814	2664.87	25.4107	101.472	102.599	2664.87	25.4107
72	Enti-12-72	170.42	0.0387408	0.5441	0.0140626	12.5662	0.372162	0.167504	0.00242222	2800.5	58.7093	2647.7	27.862	2532.92	24.2662	105.771	110.564	-	-
E-Enti-13
				Isotope ratios						Ages (Ma)						Data filter A*	Data filter B#	quoted age	±2σ
#	Spot	U [ppm]	ƒ206%	206Pb/238U	±2σ	207Pb/235U	±2σ	207Pb/206Pb	±2σ	206Pb/238U	±2σ	207Pb/235U	±2σ	207Pb/206Pb	±2σ
3	Enti-13-03	1493.63	1.04721	0.0157253	0.00346249	0.124239	0.0277693	0.0573007	0.002202	100.579	21.9745	118.908	25.0856	503.201	84.6529	84.5859	19.9879	-	-
11	Enti-13-11	1419.4	0.658874	0.0465699	0.00172572	0.446195	0.0185101	0.0694894	0.00129587	293.419	10.6293	374.612	12.9968	913.377	38.3854	78.3262	32.1246	-	-
33	Enti-13-33	1410.21	1.18055	0.0479197	0.000970357	0.385264	0.0102752	0.05831	0.0010121	301.727	5.96908	330.904	7.53175	541.501	37.961	91.1828	55.7205	-	-
52	Enti-13-52	1473.85	0.648596	0.0581437	0.00174483	0.543133	0.0183658	0.0677488	0.00105585	364.315	10.6295	440.488	12.0853	860.953	32.3439	82.7071	42.3153	-	-
53	Enti-13-53	1825.62	2.84625	0.059058	0.00197312	0.492276	0.0218455	0.0604544	0.00176571	369.882	12.0099	406.46	14.8653	619.95	63.0569	91.0009	59.6632	-	-
27	Enti-13-27	283.004	0.379697	0.0827908	0.00202533	0.671389	0.0251817	0.0588154	0.00167217	512.743	12.0575	521.557	15.2992	560.346	61.9984	98.3101	91.5047	512.743	12.0575
46	Enti-13-46	351.396	bd	0.0829802	0.00149664	0.683966	0.0192375	0.0597804	0.00129019	513.87	8.90846	529.169	11.6002	595.708	46.7777	97.1089	86.2621	513.87	8.90846
37	Enti-13-37	331.338	bd	0.0867407	0.0017938	0.735874	0.0186685	0.0615289	0.000904142	536.215	10.6403	559.995	10.9204	657.849	31.5142	95.7535	81.5103	536.215	10.6403
44	Enti-13-44	241.685	0.334088	0.0886726	0.00150071	0.718512	0.0177131	0.0587683	0.00105344	547.664	8.88596	549.788	10.4662	558.6	39.0863	99.6137	98.0422	547.664	8.88596
8	Enti-13-08	294.592	0.0369946	0.089542	0.00249902	0.723031	0.0284952	0.0585638	0.00162961	552.81	14.7853	552.455	16.7938	550.99	60.7729	100.064	100.33	552.81	14.7853
48	Enti-13-48	284.056	0.034461	0.090068	0.00142567	0.747754	0.0167729	0.0602126	0.000956982	555.921	8.4308	566.92	9.74475	611.291	34.3513	98.0598	90.9422	555.921	8.4308
86	Enti-13-86	9.98548	5.3298	0.0901328	0.00391173	0.197771	0.120442	0.0159139	0.00966693	556.304	23.1311	183.238	102.448	-	-	303.597	-	-	-
84	Enti-13-84	91.9762	bd	0.0901561	0.00225799	0.767581	0.0326233	0.0617487	0.00212033	556.442	13.3518	578.375	18.7425	665.488	73.5903	96.2079	83.6141	556.442	13.3518
2	Enti-13-02	104.88	bd	0.0902129	0.00262903	0.729712	0.031998	0.0586653	0.00192218	556.778	15.5449	556.384	18.7858	554.767	71.5256	100.071	100.363	556.778	15.5449
30	Enti-13-30	127.392	0.534106	0.0906911	0.00181033	0.756023	0.025103	0.0604602	0.00160423	559.605	10.6994	571.713	14.5162	620.16	57.2777	97.8821	90.2356	559.605	10.6994
21	Enti-13-21	880.719	0.169119	0.093493	0.00218499	0.841209	0.0276923	0.0652564	0.00151294	576.144	12.8806	619.812	15.2728	782.685	48.728	92.9545	73.6112	576.144	12.8806
49	Enti-13-49	692.756	0.0385517	0.0938206	0.00249853	0.765449	0.0245657	0.059172	0.00105978	578.075	14.7246	577.149	14.1297	573.506	38.9576	100.16	100.797	578.075	14.7246
70	Enti-13-70	789.251	bd	0.0942569	0.00260431	0.78942	0.0242765	0.0607426	0.000820119	580.645	15.3419	590.843	13.7762	630.202	29.0871	98.2741	92.1363	580.645	15.3419
17	Enti-13-17	462.538	0.0983197	0.0947121	0.0026957	0.798657	0.0279296	0.0611581	0.00124267	583.326	15.8737	596.071	15.7682	644.87	43.6783	97.8618	90.4564	583.326	15.8737
14	Enti-13-14	265.154	bd	0.095589	0.00249307	0.776308	0.0261777	0.0589012	0.00125899	588.488	14.6687	583.375	14.9649	563.521	46.5727	100.876	104.43	588.488	14.6687
22	Enti-13-22	363.772	0.342252	0.0968061	0.00267418	0.853121	0.035085	0.0639156	0.00194729	595.645	15.7168	626.361	19.2265	738.912	64.5018	95.0962	80.6112	595.645	15.7168
50	Enti-13-50	217.541	bd	0.0969389	0.00250715	0.809187	0.0291811	0.060541	0.00152147	596.426	14.7334	601.998	16.3789	623.04	54.2212	99.0744	95.7283	596.426	14.7334
28	Enti-13-28	183.531	bd	0.097538	0.00243589	0.822149	0.0299052	0.0611329	0.00161674	599.945	14.3068	609.247	16.666	643.992	56.8628	98.4733	93.1603	599.945	14.3068
71	Enti-13-71	495.075	0.0914041	0.0984402	0.00268865	0.813155	0.0250958	0.05991	0.000860938	605.242	15.7784	604.222	14.0548	600.4	31.1184	100.169	100.806	605.242	15.7784
20	Enti-13-20	266.214	bd	0.0989981	0.00260418	0.818807	0.0294369	0.0599865	0.00146998	608.515	15.2749	607.383	16.4352	603.156	53.0481	100.186	100.889	608.515	15.2749
63	Enti-13-63	402.209	bd	0.0997421	0.00265976	0.827045	0.0259327	0.0601381	0.000991999	612.877	15.5904	611.971	14.4131	608.621	35.6674	100.148	100.699	612.877	15.5904
31	Enti-13-31	138.131	bd	0.0999204	0.00205422	0.837275	0.0245144	0.0607732	0.00126694	613.923	12.039	617.641	13.5489	631.289	44.9133	99.3981	97.249	613.923	12.039
60	Enti-13-60	83.407	1.30865	0.10001	0.00296319	0.790639	0.0351491	0.0573367	0.00190036	614.449	17.3647	591.534	19.9339	504.584	72.9752	103.874	121.773	614.449	17.3647
74	Enti-13-74	123.414	0.400733	0.100106	0.00307501	0.830534	0.0337015	0.0601725	0.00159543	615.007	18.0184	613.908	18.696	609.86	57.3349	100.179	100.844	615.007	18.0184
83	Enti-13-83	213.681	bd	0.100187	0.00225255	0.82574	0.0263367	0.0597768	0.00135227	615.483	13.1981	611.246	14.6481	595.574	49.0284	100.693	103.343	615.483	13.1981
5	Enti-13-05	558.115	0.00605013	0.102003	0.00290826	0.887033	0.0364845	0.0630704	0.00186975	626.116	17.012	644.774	19.6342	710.673	63.0522	97.1063	88.1018	626.116	17.012
19	Enti-13-19	213.586	1.14512	0.102116	0.00294562	0.837559	0.0322006	0.0594867	0.00151194	626.778	17.2288	617.798	17.795	585.027	55.1891	101.454	107.137	626.778	17.2288
18	Enti-13-18	297.576	0.318671	0.102544	0.00271616	0.851446	0.0296276	0.0602204	0.00135893	629.283	15.8805	625.443	16.25	611.577	48.7757	100.614	102.895	629.283	15.8805
7	Enti-13-07	292.625	bd	0.102701	0.00262907	0.860724	0.0327578	0.0607838	0.00171182	630.198	15.3691	630.518	17.8775	631.661	60.6775	99.9493	99.7684	630.198	15.3691
36	Enti-13-36	466.301	0.160098	0.103061	0.00166934	0.868439	0.0195657	0.0611145	0.000957041	632.301	9.75548	634.719	10.6332	643.334	33.6647	99.6191	98.285	632.301	9.75548
35	Enti-13-35	230.181	0.578116	0.104255	0.00194358	0.875649	0.023895	0.0609159	0.00121391	639.278	11.3459	638.63	12.9363	636.334	42.8915	100.102	100.463	639.278	11.3459
57	Enti-13-57	531.051	0.0937502	0.106378	0.00258929	0.917624	0.0265777	0.0625625	0.000982107	651.655	15.0863	661.103	14.0738	693.46	33.4692	98.5709	93.9716	651.655	15.0863
73	Enti-13-73	859.116	bd	0.106466	0.00374061	0.903581	0.0344086	0.0615538	0.000904003	652.17	21.7926	653.639	18.3558	658.717	31.4903	99.7753	99.0061	652.17	21.7926
51	Enti-13-51	203.027	0.345354	0.107717	0.00450504	0.936377	0.0473407	0.0630473	0.00179089	659.453	26.2166	670.984	24.8291	709.901	60.42	98.2814	92.8936	659.453	26.2166
65	Enti-13-65	459.463	bd	0.108042	0.00400792	0.907807	0.0377152	0.0609398	0.00113992	661.343	23.3168	655.891	20.0756	637.183	40.2594	100.831	103.792	661.343	23.3168
15	Enti-13-15	233.521	0.51711	0.110175	0.00285307	0.943029	0.0345587	0.0620785	0.0016097	673.742	16.5663	674.466	18.0615	676.885	55.4466	99.8926	99.5358	673.742	16.5663
66	Enti-13-66	408.668	0.0517598	0.116144	0.00304977	1.03751	0.0310036	0.0647878	0.000924146	708.311	17.6137	722.678	15.4517	767.522	30.0455	98.012	92.2855	708.311	17.6137
59	Enti-13-59	172.051	bd	0.116385	0.00343898	1.04492	0.0370534	0.0651159	0.00127656	709.699	19.8573	726.365	18.4005	778.155	41.2321	97.7055	91.2027	709.699	19.8573
77	Enti-13-77	225.87	bd	0.116462	0.00336088	1.05592	0.0361052	0.0657572	0.00120605	710.145	19.405	731.808	17.8336	798.726	38.4426	97.0398	88.9097	710.145	19.405
16	Enti-13-16	126.329	bd	0.116525	0.0031302	1.00156	0.0375224	0.0623385	0.0016279	710.508	18.0721	704.601	19.0372	685.811	55.7613	100.838	103.601	710.508	18.0721
55	Enti-13-55	611.306	bd	0.12231	0.00308822	1.07754	0.031677	0.0638957	0.000962023	743.821	17.7379	742.433	15.4831	738.254	31.867	100.187	100.754	743.821	17.7379
42	Enti-13-42	574.336	bd	0.127562	0.0017874	1.1829	0.0222774	0.067255	0.000846299	773.916	10.2185	792.661	10.3628	845.752	26.1784	97.6352	91.5063	773.916	10.2185
39	Enti-13-39	77.4231	bd	0.127767	0.00306047	1.17613	0.0435136	0.066763	0.00188246	775.089	17.4934	789.509	20.3062	830.464	58.8179	98.1735	93.332	775.089	17.4934
58	Enti-13-58	413.794	0.0236081	0.131308	0.00325661	1.10023	0.0404132	0.0607702	0.00164653	795.298	18.5563	753.462	19.5407	631.185	58.3839	105.553	126.001	795.298	18.5563
10	Enti-13-10	85.9729	bd	0.135064	0.00392297	1.23341	0.0552471	0.066232	0.0022584	816.664	22.2792	815.892	25.1223	813.785	71.3348	100.095	100.354	816.664	22.2792
62	Enti-13-62	96.1106	0.154888	0.135716	0.00397319	1.25873	0.0456239	0.0672669	0.00143752	820.366	22.5515	827.339	20.5124	846.124	44.4651	99.1572	96.9558	820.366	22.5515
61	Enti-13-61	33.3767	bd	0.136104	0.00458668	1.25108	0.0693374	0.0666673	0.0029333	822.569	26.0248	823.893	31.2855	827.47	91.8913	99.8393	99.4077	822.569	26.0248
76	Enti-13-76	626.202	bd	0.137071	0.00378481	1.26096	0.0384204	0.0667195	0.000859495	828.053	21.4567	828.337	17.2561	829.101	26.865	99.9656	99.8736	828.053	21.4567
1	Enti-13-01	619.228	0.297114	0.137477	0.00439531	1.30867	0.0536147	0.0690398	0.00176866	830.352	24.9088	849.543	23.5847	900.006	52.8574	97.7411	92.2607	830.352	24.9088
25	Enti-13-25	283.276	bd	0.140668	0.00296438	1.32104	0.0425608	0.0681113	0.00165985	848.41	16.7525	854.967	18.6211	872.016	50.4971	99.2331	97.293	848.41	16.7525
43	Enti-13-43	68.2267	0.123875	0.14338	0.00289544	1.35277	0.0359233	0.0684283	0.00118002	863.719	16.3241	868.757	15.5046	881.629	35.677	99.4201	97.9685	863.719	16.3241
13	Enti-13-13	111.246	0.0841562	0.147697	0.00440056	1.41242	0.0562304	0.069357	0.00183139	888.014	24.7165	894.177	23.6716	909.448	54.4024	99.3107	97.6432	888.014	24.7165
81	Enti-13-81	85.5021	0.0299467	0.150857	0.00316847	1.44933	0.0493658	0.0696787	0.00186842	905.736	17.7474	909.594	20.4677	918.965	55.1605	99.5759	98.5604	905.736	17.7474
32	Enti-13-32	188.341	bd	0.1537	0.0027678	1.54616	0.0358611	0.0729593	0.00106646	921.64	15.4649	948.965	14.302	1012.89	29.6307	97.1206	90.9909	921.64	15.4649
34	Enti-13-34	269.083	0.00989063	0.160198	0.00368988	1.5831	0.0454316	0.071672	0.00122691	957.846	20.5015	963.588	17.8604	976.71	34.8949	99.4041	98.0686	957.846	20.5015
75	Enti-13-75	92.1297	0.33512	0.16038	0.00464172	1.6148	0.0572169	0.0730241	0.00149271	958.86	25.7861	975.974	22.2221	1014.7	41.4324	98.2465	94.4973	958.86	25.7861
40	Enti-13-40	131.229	0.0753224	0.160738	0.00291355	1.60139	0.0380185	0.0722564	0.00110786	960.847	16.1805	970.752	14.8406	993.247	31.1756	98.9796	96.7379	960.847	16.1805
29	Enti-13-29	53.3653	0.388521	0.161315	0.00422535	1.64728	0.0714627	0.0740613	0.00256122	964.048	23.4541	988.507	27.4167	1043.21	69.8185	97.5256	92.4116	964.048	23.4541
67	Enti-13-67	151.692	bd	0.161323	0.00445425	1.59823	0.0512675	0.0718523	0.00117326	964.096	24.7245	969.519	20.0379	981.832	33.2594	99.4407	98.1936	964.096	24.7245
45	Enti-13-45	324.249	0.224781	0.162085	0.00287241	1.59166	0.038233	0.0712207	0.00115488	968.32	15.9336	966.947	14.9804	963.826	33.1211	100.142	100.466	968.32	15.9336
26	Enti-13-26	289.788	bd	0.165453	0.0038725	1.65574	0.0585022	0.0725796	0.00192112	986.978	21.4192	991.747	22.3711	1002.31	53.7539	99.5192	98.4707	986.978	21.4192
68	Enti-13-68	110.003	0.972261	0.166587	0.00504151	1.651	0.0604233	0.0718794	0.00147927	993.247	27.858	989.934	23.1473	982.594	41.914	100.335	101.084	993.247	27.858
38	Enti-13-38	117.22	bd	0.170581	0.00462175	1.77651	0.0775966	0.075533	0.00258779	1015.28	25.4514	1036.9	28.3848	1082.79	68.7551	97.9143	93.7651	1015.28	25.4514
23	Enti-13-23	113.215	0.0195149	0.17301	0.0041561	1.76428	0.0631873	0.0739596	0.00196464	1028.64	22.8397	1032.42	23.2142	1040.43	53.6394	99.6339	98.8664	1028.64	22.8397
64	Enti-13-64	58.2807	bd	0.174941	0.00726336	1.88658	0.0951607	0.0782136	0.00224033	1039.24	39.8503	1076.38	33.4859	1152.38	56.8819	96.5499	90.1826	1039.24	39.8503
6	Enti-13-06	737.235	0.169124	0.237125	0.00666051	6.16098	0.232999	0.188439	0.00477188	1371.69	34.7058	1998.93	33.0494	2728.65	41.7089	68.6212	50.27	-	-
80	Enti-13-80	111.883	0.0458327	0.266654	0.00573136	4.16452	0.125734	0.11327	0.00240167	1523.75	29.168	1667.07	24.7252	1852.59	38.3329	91.4028	82.2494	-	-
69	Enti-13-69	204.604	bd	0.283448	0.00788262	4.26547	0.142329	0.109142	0.00201254	1608.65	39.5915	1686.72	27.4531	1785.22	33.617	95.3713	90.1096	1785.22	33.617
72	Enti-13-72	94.8026	0.19417	0.308816	0.00928158	4.80713	0.175149	0.112898	0.00232528	1734.82	45.7146	1786.15	30.6344	1846.64	37.2648	97.1265	93.9446	1846.64	37.2648
85	Enti-13-85	670.51	bd	0.313119	0.00702818	4.926	0.141419	0.114099	0.00204228	1755.98	34.5022	1806.72	24.2359	1865.77	32.3105	97.1916	94.1154	1865.77	32.3105
47	Enti-13-47	314.311	0.0900921	0.402554	0.00935435	9.76015	0.287249	0.175846	0.0031759	2180.72	42.9937	2412.4	27.1127	2614.14	30.0694	90.3963	83.4201	-	-
12	Enti-13-12	97.9834	0.0742805	0.407265	0.0117412	8.9292	0.317494	0.159014	0.00330942	2202.33	53.7839	2330.79	32.4787	2445.26	35.2335	94.4886	90.0652	2445.26	35.2335
78	Enti-13-78	583.617	0.0250751	0.416177	0.00693277	10.0484	0.248743	0.175113	0.00320645	2243.03	31.5571	2439.24	22.8641	2607.19	30.5033	91.956	86.0325	-	-
79	Enti-13-79	147.7	0.0153278	0.428226	0.00835316	10.3484	0.282899	0.175266	0.00335687	2297.64	37.7019	2466.44	25.3173	2608.65	31.9052	93.1561	88.0779	-	-
54	Enti-13-54	115.671	0.17782	0.433868	0.0131702	10.8649	0.363333	0.181621	0.00254825	2323.06	59.2108	2511.63	31.1034	2667.79	23.241	92.4919	87.0778	-	-
82	Enti-13-82	114.85	0.262446	0.467201	0.0103955	10.5173	0.312887	0.163267	0.0032241	2471.2	45.6739	2481.44	27.5915	2489.84	33.2785	99.5871	99.2512	2489.84	33.2785
9	Enti-13-09	93.339	0.107037	0.490529	0.014525	12.0819	0.480739	0.178637	0.00474794	2572.88	62.8192	2610.79	37.3304	2640.32	44.1456	98.5482	97.4459	2640.32	44.1456
4	Enti-13-04	313.914	0.0477725	0.497425	0.0128146	12.475	0.452178	0.181891	0.00463789	2602.64	55.1662	2640.85	34.0858	2670.25	42.2287	98.5532	97.4677	2670.25	42.2287
24	Enti-13-24	129.263	bd	0.523474	0.0146615	13.1209	0.467736	0.181789	0.00400898	2713.81	62.0385	2688.39	33.6454	2669.33	36.5257	100.946	101.666	2669.33	36.5257
56	Enti-13-56	159.943	bd	0.56444	0.0137899	15.1397	0.420141	0.194535	0.00256046	2884.86	56.8223	2824.06	26.438	2780.95	21.5721	102.153	103.737	2780.95	21.5721
41	Enti-13-41	349.67	0.121675	0.597899	0.00866488	21.2302	0.423321	0.257529	0.00352693	3021.27	34.956	3149.16	19.3379	3231.71	21.6007	95.9388	93.4882	3231.71	21.6007
Nib-1
				Isotope ratios						Ages (Ma)						Data filter A*	Data filter B#	quoted age	±2σ
#	Spot	U [ppm]	ƒ206%	206Pb/238U	±2σ	207Pb/235U	±2σ	207Pb/206Pb	±2σ	206Pb/238U	±2σ	207Pb/235U	±2σ	207Pb/206Pb	±2σ
56	Nib-1-56	2618.75	45.8911	0.0261818	0.000764554	0.208204	0.0167439	0.0576752	0.0043217	166.602	4.80273	192.045	14.0726	517.516	165.067	86.7515	32.1926	-	-
33	Nib-1-33	3363.36	22.9912	0.0300152	0.000990031	0.243043	0.0678006	0.0587275	0.016268	190.637	6.19598	220.909	55.4381	557.084	534.225	86.2965	34.2205	-	-
30	Nib-1-30	1230.42	19.2562	0.0326173	0.00114375	0.404506	0.0616221	0.0899449	0.0133342	206.901	7.13999	344.911	44.5781	1424.43	286.398	59.9869	14.5252	-	-
58	Nib-1-58	2735.4	22.3019	0.0448165	0.00121609	0.350823	0.0867414	0.0567739	0.0139526	282.61	7.50294	305.34	65.2914	482.831	474.792	92.5558	58.5318	-	-
75	Nib-1-75	4.2004	3.62742	0.0659575	0.00811052	0.605423	0.168229	0.0665722	0.0165885	411.742	49.048	480.669	106.792	824.494	539.374	85.6601	49.9387	-	-
11	Nib-1-11	190.631	7.88518	0.0673885	0.00146795	0.375331	0.0525669	0.040395	0.00558867	420.389	8.86527	323.597	38.8282	-	-	129.911	-	-	-
1	Nib-1-01	767.544	2.67773	0.081491	0.00171421	0.649894	0.022766	0.0578405	0.00162018	505	10.2175	508.414	14.0116	523.801	61.4595	99.3285	96.4106	505	10.2175
9	Nib-1-09	1450.48	6.68907	0.084961	0.00287956	0.701219	0.0963219	0.0598595	0.00796829	525.649	17.1087	539.519	57.5519	598.578	291.333	97.4293	87.8163	525.649	17.1087
61	Nib-1-61	223.949	0.0983356	0.0855747	0.00176063	0.682814	0.0228825	0.0578702	0.00153084	529.295	10.4547	528.474	13.8078	524.926	58.0263	100.155	100.832	529.295	10.4547
38	Nib-1-38	106.939	1.10695	0.0868153	0.0024103	0.696017	0.0362627	0.0581463	0.00256347	536.657	14.2962	536.409	21.7133	535.35	96.612	100.046	100.244	536.657	14.2962
12	Nib-1-12	447.344	bd	0.0916737	0.00146518	0.745899	0.0166453	0.0590112	0.000919036	565.41	8.65173	565.842	9.68087	567.584	33.9079	99.9235	99.6169	565.41	8.65173
55	Nib-1-55	639.706	0.359053	0.0928286	0.0036943	0.788433	0.0391547	0.0616002	0.0018299	572.226	21.7914	590.283	22.2336	660.329	63.7054	96.9409	86.6577	572.226	21.7914
39	Nib-1-39	147.289	0.610766	0.0946538	0.00341767	0.801797	0.0392462	0.0614363	0.00203034	582.983	20.1261	597.842	22.1202	654.616	70.9486	97.5146	89.0572	582.983	20.1261
37	Nib-1-37	43.4471	0.388628	0.0952056	0.00266543	0.780404	0.041347	0.0594505	0.00267411	586.232	15.6883	585.714	23.5849	583.701	97.7707	100.088	100.434	586.232	15.6883
34	Nib-1-34	422.777	0.360648	0.0959805	0.00208333	0.790555	0.027064	0.0597376	0.00158145	590.791	12.2535	591.487	15.3485	594.153	57.3969	99.8824	99.4341	590.791	12.2535
63	Nib-1-63	150.033	0.907932	0.0975782	0.00207957	0.809461	0.028262	0.0601647	0.00166389	600.181	12.2136	602.152	15.8606	609.574	59.8049	99.6728	98.4591	600.181	12.2136
2	Nib-1-02	148.464	0.111718	0.0985127	0.00238786	0.812248	0.0269651	0.0597992	0.0013565	605.667	14.0123	603.714	15.1093	596.385	49.1571	100.323	101.556	605.667	14.0123
24	Nib-1-24	252.105	0.225606	0.0993088	0.00269919	0.846766	0.0344191	0.0618407	0.00186908	610.337	15.8277	622.872	18.9264	668.674	64.7306	97.9875	91.2758	610.337	15.8277
50	Nib-1-50	891.737	7.37845	0.0996347	0.00297947	0.797743	0.041278	0.0580699	0.00245213	612.248	17.4661	595.554	23.3183	532.47	92.5732	102.803	114.983	612.248	17.4661
52	Nib-1-52	126.87	0.0828033	0.100027	0.00294722	0.838379	0.0338763	0.0607884	0.00168087	614.549	17.2709	618.251	18.7129	631.833	59.576	99.4012	97.2644	614.549	17.2709
64	Nib-1-64	265.538	bd	0.100073	0.00263789	0.852775	0.036863	0.061804	0.00211741	614.816	15.4575	626.171	20.2049	667.405	73.3995	98.1866	92.1203	614.816	15.4575
59	Nib-1-59	380.233	2.65013	0.100752	0.00203734	0.862402	0.036555	0.0620806	0.0023127	618.792	11.931	631.433	19.9324	676.961	79.6938	97.9981	91.4074	618.792	11.931
13	Nib-1-13	149.045	bd	0.101873	0.00191835	0.874641	0.0303847	0.0622688	0.00181783	625.354	11.2228	638.084	16.4591	683.427	62.3703	98.005	91.5027	625.354	11.2228
18	Nib-1-18	383.866	bd	0.102284	0.00163243	0.87335	0.0224561	0.0619266	0.00124844	627.762	9.54653	637.384	12.1721	671.649	43.1395	98.4904	93.4658	627.762	9.54653
20	Nib-1-20	23.545	bd	0.104418	0.00271872	0.865424	0.0493899	0.0601106	0.0030527	640.23	15.8685	633.08	26.8901	607.629	109.978	101.129	105.365	640.23	15.8685
67	Nib-1-67	138.434	0.868318	0.105718	0.00237921	0.887329	0.0339811	0.0608745	0.00188622	647.81	13.8706	644.934	18.2838	634.875	66.7334	100.446	102.037	647.81	13.8706
36	Nib-1-36	297.834	bd	0.106508	0.00294197	0.910251	0.0391241	0.0619839	0.00204118	652.413	17.1392	657.191	20.7991	673.623	70.4718	99.273	96.8514	652.413	17.1392
81	Nib-1-81	82.2887	0.228301	0.10688	0.00255828	0.920653	0.0373754	0.0624739	0.00204849	654.581	14.8988	662.705	19.7616	690.446	69.9806	98.7741	94.8056	654.581	14.8988
69	Nib-1-69	79.3229	0.947747	0.109254	0.0023931	0.93654	0.0354731	0.0621709	0.00192113	668.393	13.907	671.07	18.6016	680.07	66.0563	99.6011	98.283	668.393	13.907
54	Nib-1-54	142.545	bd	0.109768	0.00323797	0.948854	0.035833	0.0626935	0.0014783	671.379	18.8082	677.506	18.6717	697.923	50.2491	99.0957	96.1967	671.379	18.8082
84	Nib-1-84	507.089	4.81958	0.111596	0.00354291	0.963515	0.0482787	0.0626193	0.00242749	681.988	20.5456	685.116	24.9712	695.405	82.6883	99.5435	98.0707	681.988	20.5456
10	Nib-1-10	197.428	0.89788	0.114907	0.00332788	0.997253	0.0395376	0.0629446	0.00170425	701.159	19.2413	702.414	20.1032	706.429	57.621	99.8213	99.2539	701.159	19.2413
7	Nib-1-07	1886.97	4.18048	0.116589	0.00451277	3.06981	0.132537	0.190964	0.00365243	710.878	26.0529	1425.19	33.0785	2750.55	31.4379	49.8796	25.8449	-	-
17	Nib-1-17	146.258	0.101383	0.11695	0.00366584	1.07787	0.0457828	0.0668444	0.001916	712.963	21.1566	742.595	22.376	833.001	59.7715	96.0097	85.5897	712.963	21.1566
28	Nib-1-28	338.629	0.0572681	0.121191	0.00243293	1.0636	0.0311562	0.0636516	0.00135784	737.389	13.988	735.598	15.3314	730.147	45.2185	100.244	100.992	737.389	13.988
53	Nib-1-53	241.683	bd	0.12488	0.00406349	1.08817	0.0428395	0.0631977	0.00140048	758.567	23.2862	747.613	20.8339	714.965	47.0924	101.465	106.099	758.567	23.2862
41	Nib-1-41	55.925	1.44779	0.126166	0.00434815	1.14988	0.0676646	0.0661011	0.0031528	765.933	24.8891	777.188	31.9684	809.655	99.9165	98.5519	94.5999	765.933	24.8891
35	Nib-1-35	148.563	0.038841	0.126595	0.0030391	1.1313	0.0416183	0.0648124	0.00180669	768.388	17.3893	768.372	19.8301	768.323	58.732	100.002	100.008	768.388	17.3893
82	Nib-1-82	779.872	0.0120814	0.127724	0.00203839	1.14647	0.0242454	0.0651016	0.000903307	774.841	11.6517	775.576	11.4697	777.698	29.1824	99.9051	99.6326	774.841	11.6517
79	Nib-1-79	52.2661	bd	0.128655	0.00262945	1.16286	0.0394792	0.0655542	0.0017771	780.163	15.0179	783.3	18.536	792.251	56.8914	99.5995	98.4743	780.163	15.0179
5	Nib-1-05	112.182	bd	0.128805	0.00296054	1.17636	0.0366018	0.066238	0.00138912	781.02	16.9066	789.618	17.0782	813.975	43.8547	98.9111	95.9513	781.02	16.9066
48	Nib-1-48	77.9481	bd	0.129136	0.0040898	1.16237	0.0529743	0.0652825	0.00213943	782.911	23.3486	783.071	24.88	783.525	68.8887	99.9796	99.9217	782.911	23.3486
19	Nib-1-19	64.5545	0.327423	0.130493	0.00261343	1.235	0.0436279	0.0686403	0.00199747	790.651	14.9021	816.613	19.8231	888.019	60.1578	96.8207	89.0354	790.651	14.9021
32	Nib-1-32	82.7201	bd	0.132667	0.00336506	1.22458	0.0545104	0.0669457	0.00244886	803.038	19.1512	811.869	24.8856	836.158	76.2653	98.9123	96.039	803.038	19.1512
22	Nib-1-22	70.3873	bd	0.133241	0.00297695	1.21115	0.0561817	0.0659262	0.00268002	806.302	16.9338	805.719	25.8048	804.105	85.2013	100.072	100.273	806.302	16.9338
44	Nib-1-44	73.4489	0.33424	0.133266	0.00553563	1.21339	0.0669016	0.0660356	0.00239427	806.444	31.4878	806.746	30.7002	807.576	75.9363	99.9627	99.8599	806.444	31.4878
71	Nib-1-71	243.367	0.357513	0.134438	0.00271206	1.23114	0.0487949	0.066418	0.00226589	813.107	15.4107	814.859	22.2099	819.65	71.3062	99.7849	99.2017	813.107	15.4107
23	Nib-1-23	314.761	0.28332	0.137859	0.00225907	1.45272	0.0348328	0.0764271	0.00133779	832.516	12.7981	911.001	14.4211	1106.35	34.9903	91.3848	75.2487	832.516	12.7981
46	Nib-1-46	513.832	1.98083	0.146404	0.00511483	1.40314	0.118942	0.0695101	0.00536856	880.744	28.7608	890.264	50.2969	913.987	159.473	98.9307	96.3628	880.744	28.7608
26	Nib-1-26	101.767	0.78122	0.150501	0.00332344	1.4574	0.0508494	0.0702325	0.0018972	903.743	18.6212	912.936	21.0137	935.225	55.4276	98.9931	96.6337	903.743	18.6212
70	Nib-1-70	240.129	0.0308406	0.157374	0.00363114	1.52642	0.049025	0.070346	0.00157167	942.138	20.2244	941.06	19.7059	938.544	45.8145	100.114	100.383	942.138	20.2244
8	Nib-1-08	180.15	0.225947	0.157716	0.00512301	1.56724	0.0639364	0.0720707	0.0017788	944.04	28.5253	957.334	25.2931	988.011	50.2348	98.6113	95.5495	944.04	28.5253
72	Nib-1-72	140.635	0.4181	0.158737	0.00400764	1.55804	0.0577776	0.0711866	0.00193358	949.725	22.2951	953.689	22.938	962.844	55.4991	99.5843	98.6375	949.725	22.2951
15	Nib-1-15	84.2731	bd	0.159538	0.00282073	1.6253	0.0451779	0.0738872	0.00158479	954.176	15.6813	980.042	17.4751	1038.46	43.3159	97.3607	91.8837	954.176	15.6813
25	Nib-1-25	177.268	bd	0.160534	0.00255669	1.60007	0.0423354	0.0722887	0.00152735	959.712	14.2012	970.236	16.5344	994.153	42.9583	98.9153	96.5356	959.712	14.2012
21	Nib-1-21	76.9629	bd	0.16095	0.00558887	1.56824	0.0755511	0.0706675	0.00235984	962.024	31.0326	957.73	29.8786	947.881	68.4023	100.448	101.492	962.024	31.0326
80	Nib-1-80	288.288	0.0370458	0.16126	0.00385593	1.58006	0.0447439	0.0710631	0.00107809	963.746	21.4045	962.392	17.6107	959.306	31.004	100.141	100.463	963.746	21.4045
43	Nib-1-43	108.286	0.245071	0.161271	0.00520559	1.61241	0.0687347	0.0725132	0.00201907	963.805	28.8964	975.044	26.7218	1000.45	56.5672	98.8474	96.3374	963.805	28.8964
65	Nib-1-65	860.769	2.45185	0.161552	0.00529777	1.58201	0.0614458	0.0710229	0.00147819	965.362	29.401	963.162	24.1682	958.142	42.5529	100.228	100.754	965.362	29.401
68	Nib-1-68	46.9575	bd	0.163707	0.00431109	1.61905	0.0695962	0.0717283	0.00243697	977.312	23.8809	977.621	26.9883	978.312	69.2701	99.9685	99.8978	977.312	23.8809
60	Nib-1-60	82.6233	0.645485	0.166884	0.00342209	1.67197	0.0529623	0.0726626	0.00175435	994.89	18.9047	997.934	20.129	1004.62	49.0141	99.695	99.031	994.89	18.9047
76	Nib-1-76	259.003	0.0238057	0.167903	0.00404597	1.68298	0.0635009	0.0726974	0.0021107	1000.51	22.3317	1002.11	24.0366	1005.6	58.9371	99.8408	99.4946	1000.51	22.3317
66	Nib-1-66	51.6105	bd	0.175135	0.00530744	1.83142	0.0940729	0.0758426	0.0031455	1040.31	29.1142	1056.79	33.7482	1090.99	83.1556	98.4406	95.3547	1040.31	29.1142
74	Nib-1-74	126.392	0.0549152	0.177077	0.00376983	1.81096	0.0573089	0.0741729	0.00173669	1050.95	20.6454	1049.42	20.7042	1046.24	47.2307	100.146	100.45	1050.95	20.6454
83	Nib-1-83	252.426	0.0114122	0.185151	0.00291305	1.94879	0.0456168	0.0763373	0.00132305	1095.02	15.8445	1098.03	15.7089	1104	34.6565	99.7259	99.1869	1095.02	15.8445
40	Nib-1-40	88.0968	0.234408	0.208562	0.00669138	2.36102	0.103037	0.082104	0.00242891	1221.11	35.6907	1230.89	31.1378	1248.07	57.9453	99.2053	97.84	1248.07	57.9453
27	Nib-1-27	1796.52	1.40664	0.213073	0.00537381	3.57357	0.106714	0.121639	0.00194496	1245.13	28.5563	1543.68	23.696	1980.47	28.4719	80.6597	62.8703	-	-
47	Nib-1-47	1574.53	3.99272	0.272907	0.0164321	5.96218	0.413217	0.158449	0.00543816	1555.49	83.2196	1970.34	60.3356	2439.24	58.1598	78.9452	63.7696	-	-
4	Nib-1-04	377.839	0.0152072	0.27466	0.00556456	3.54324	0.0913914	0.093563	0.00149358	1564.36	28.1413	1536.92	20.4281	1499.38	30.1886	101.785	104.334	1499.38	30.1886
49	Nib-1-49	210.122	bd	0.305382	0.00934311	4.39643	0.162493	0.104413	0.0021652	1717.89	46.1387	1711.67	30.5837	1704.07	38.1899	100.363	100.811	1704.07	38.1899
6	Nib-1-06	482.234	0.508466	0.321942	0.00859279	4.95648	0.148329	0.111659	0.00151134	1799.15	41.9018	1811.93	25.2905	1826.66	24.5476	99.2947	98.4938	1826.66	24.5476
16	Nib-1-16	345.108	bd	0.331758	0.00597069	5.0296	0.11912	0.109954	0.00169282	1846.84	28.9006	1824.32	20.0625	1798.71	28.019	101.234	102.676	1798.71	28.019
85	Nib-1-85	454.738	0.0909566	0.33592	0.00550778	5.44789	0.1099	0.117623	0.00138232	1866.95	26.5768	1892.42	17.3082	1920.49	21.0762	98.6539	97.2124	1920.49	21.0762
29	Nib-1-29	108.955	0.877724	0.380629	0.00707016	7.58693	0.333544	0.144565	0.00576036	2079.15	33.0111	2183.32	39.4606	2282.67	68.6407	95.229	91.0842	2282.67	68.6407
42	Nib-1-42	422.812	0.312441	0.381317	0.0113657	6.65928	0.253014	0.12666	0.00298428	2082.37	53.0415	2067.24	33.554	2052.19	41.6136	100.732	101.471	2052.19	41.6136
14	Nib-1-14	118.853	bd	0.432675	0.00803623	9.77126	0.238335	0.16379	0.00258961	2317.69	36.1587	2413.45	22.471	2495.23	26.6314	96.0325	92.885	2495.23	26.6314
62	Nib-1-62	107.967	bd	0.436768	0.0080731	10.3024	0.263642	0.171074	0.00302768	2336.08	36.2212	2462.32	23.6893	2568.25	29.5973	94.8733	90.9601	2568.25	29.5973
31	Nib-1-31	373.501	bd	0.440151	0.00902748	9.8039	0.322166	0.161546	0.00414763	2351.24	40.4081	2416.52	30.2871	2471.97	43.354	97.2987	95.1162	2471.97	43.354
57	Nib-1-57	136.467	0.178454	0.450806	0.0126707	10.9459	0.365557	0.1761	0.00317642	2398.76	56.2997	2518.54	31.0815	2616.55	30.0217	95.2438	91.6762	2616.55	30.0217
77	Nib-1-77	111.593	0.0741142	0.456424	0.00859848	10.3321	0.253547	0.164179	0.00258184	2423.67	38.0577	2464.98	22.7222	2499.23	26.474	98.324	96.9766	2499.23	26.474
51	Nib-1-51	71.0136	bd	0.458063	0.014389	9.88335	0.377569	0.156487	0.00340219	2430.92	63.617	2423.96	35.2402	2418.11	36.9072	100.287	100.53	2418.11	36.9072
73	Nib-1-73	251.605	bd	0.458349	0.00879266	11.5074	0.313498	0.182088	0.00352229	2432.18	38.8659	2565.18	25.4559	2672.05	32.0244	94.8152	91.0232	2672.05	32.0244
45	Nib-1-45	165.404	0.0749465	0.4631	0.0201572	10.6285	0.536422	0.166455	0.00425248	2453.15	88.8152	2491.2	46.8728	2522.38	42.9201	98.4726	97.2555	2522.38	42.9201
3	Nib-1-03	167.311	0.0852532	0.466437	0.0112048	10.7896	0.302447	0.167769	0.00242365	2467.84	49.2552	2505.17	26.054	2535.58	24.2329	98.5097	97.3285	2535.58	24.2329
78	Nib-1-78	93.6113	0.208578	0.497398	0.00797547	12.7828	0.262217	0.186388	0.00238471	2602.52	34.3342	2663.78	19.32	2710.61	21.1048	97.7005	96.0123	2710.61	21.1048
Nib-3
				Isotope ratios						Ages (Ma)						Data filter A*	Data filter B#	quoted age	±2σ
#	Spot	U [ppm]	ƒ206%	206Pb/238U	±2σ	207Pb/235U	±2σ	207Pb/206Pb	±2σ	206Pb/238U	±2σ	207Pb/235U	±2σ	207Pb/206Pb	±2σ
33	Nib-3-33	720.949	26.4832	0.0174465	0.00116169	0.0770332	0.116015	0.0320236	0.0481814	111.494	7.36007	75.3518	109.8	-	-	147.964	-	-	-
46	Nib-3-46	505.77	7.57266	0.0292325	0.00445823	0.248241	0.0608903	0.0615895	0.011832	185.737	27.9226	225.146	49.5706	659.957	420.961	82.4961	28.1438	-	-
68	Nib-3-68	1291.55	14.5374	0.0323173	0.00125801	0.293182	0.0181736	0.0657962	0.00317403	205.028	7.85554	261.061	14.2705	799.966	101.209	78.5367	25.6296	-	-
32	Nib-3-32	1763.06	23.2784	0.0394436	0.000764821	0.368637	0.0273226	0.0677832	0.00484897	249.375	4.74311	318.643	20.2731	862.002	148.845	78.2615	28.9297	-	-
1	Nib-3-01	762.173	7.82485	0.0472398	0.00177081	0.431993	0.0551371	0.0663235	0.00809184	297.543	10.9001	364.591	39.1154	816.674	257.13	81.6103	36.4335	-	-
34	Nib-3-34	222.162	0.796512	0.0651196	0.00197211	0.554079	0.0200289	0.0617104	0.00121798	406.672	11.9354	447.665	13.087	664.163	42.2907	90.843	61.2308	-	-
44	Nib-3-44	762.618	10.423	0.0737855	0.00176344	0.57096	0.0844913	0.0561221	0.00819597	458.907	10.5864	458.635	54.6633	457.273	328.24	100.059	100.357	458.907	10.5864
63	Nib-3-63	546.698	7.48814	0.0766178	0.00814784	0.536549	0.0857664	0.0507901	0.00606136	475.888	48.7858	436.147	56.7352	231.395	242.92	109.112	205.66	475.888	48.7858
70	Nib-3-70	514.164	4.01023	0.0804469	0.00306078	0.661827	0.0290065	0.059667	0.00129808	498.774	18.2614	515.731	17.7249	591.588	47.1783	96.7119	84.311	498.774	18.2614
57	Nib-3-57	76.8774	0.981408	0.0874244	0.0021588	0.706089	0.0350884	0.0585767	0.00252611	540.269	12.7973	542.421	20.8859	551.476	94.2373	99.6033	97.9678	540.269	12.7973
81	Nib-3-81	230.627	bd	0.0880123	0.00200079	0.709104	0.0199395	0.0584339	0.000967074	543.754	11.8542	544.214	11.8466	546.145	36.1633	99.9154	99.562	543.754	11.8542
11	Nib-3-11	259.54	0.474849	0.0907242	0.00244864	0.783485	0.0337201	0.0626335	0.00209974	559.8	14.4715	587.47	19.2	695.882	71.4827	95.2901	80.4447	559.8	14.4715
59	Nib-3-59	308.636	0.208916	0.0937085	0.00283102	0.762698	0.0275277	0.0590299	0.0011657	577.414	16.6858	575.566	15.8583	568.271	42.9964	100.321	101.609	577.414	16.6858
3	Nib-3-03	188.236	bd	0.0940087	0.00227267	0.76845	0.0253866	0.0592852	0.00133483	579.183	13.3912	578.874	14.5771	577.655	48.9473	100.053	100.265	579.183	13.3912
48	Nib-3-48	142.523	0.00642952	0.0941141	0.00253043	0.771132	0.0310578	0.0594255	0.00178199	579.804	14.9086	580.412	17.8071	582.795	65.1455	99.8952	99.4868	579.804	14.9086
47	Nib-3-47	72.906	0.510314	0.0946913	0.00293937	0.777719	0.0376979	0.0595677	0.00221765	583.204	17.3088	584.181	21.5352	587.983	80.8334	99.8327	99.1872	583.204	17.3088
40	Nib-3-40	637.561	0.121214	0.097635	0.00248511	0.820613	0.0267848	0.0609581	0.00124556	600.515	14.5946	608.391	14.9394	637.832	43.9739	98.7055	94.1494	600.515	14.5946
45	Nib-3-45	378.581	0.223418	0.0981187	0.00219838	0.831414	0.0235866	0.061456	0.00106943	603.355	12.905	614.397	13.0778	655.303	37.3363	98.2028	92.0726	603.355	12.905
41	Nib-3-41	375.661	0.118805	0.0983638	0.00250934	0.854327	0.0330241	0.0629923	0.0018294	604.794	14.7271	627.021	18.0851	708.041	61.7933	96.4551	85.4179	604.794	14.7271
37	Nib-3-37	477.6	0.00659305	0.0984104	0.00185192	0.814566	0.0202309	0.0600321	0.000973039	605.067	10.8683	605.012	11.3212	604.806	35.0714	100.009	100.043	605.067	10.8683
4	Nib-3-04	712.229	0.0145612	0.0984882	0.0021751	0.825084	0.0231902	0.0607593	0.00105629	605.524	12.7641	610.881	12.9025	630.794	37.4508	99.123	95.9939	605.524	12.7641
7	Nib-3-07	213.881	0.278224	0.0984994	0.00279557	0.819147	0.0313844	0.0603152	0.00155235	605.589	16.405	607.573	17.5194	614.972	55.6087	99.6736	98.4743	605.589	16.405
2	Nib-3-02	320.099	0.0610124	0.0990243	0.00214011	0.820763	0.0247451	0.0601138	0.00126365	608.669	12.5526	608.474	13.8004	607.753	45.4664	100.032	100.151	608.669	12.5526
10	Nib-3-10	302.854	0.117442	0.100651	0.00230341	0.847059	0.027047	0.0610374	0.00135913	618.2	13.4904	623.034	14.8696	640.626	47.8983	99.2242	96.4994	618.2	13.4904
42	Nib-3-42	376.459	1.12553	0.101671	0.00328834	0.854215	0.0376533	0.060935	0.00182493	624.177	19.2411	626.96	20.6221	637.012	64.4779	99.556	97.9851	624.177	19.2411
71	Nib-3-71	194.892	bd	0.102831	0.00312405	0.841936	0.0305945	0.0593816	0.00118393	630.961	18.2605	620.213	16.867	581.183	43.3111	101.733	108.565	630.961	18.2605
43	Nib-3-43	159.285	bd	0.102915	0.00251922	0.862316	0.0283182	0.0607697	0.00133034	631.448	14.7241	631.386	15.441	631.166	47.164	100.01	100.045	631.448	14.7241
19	Nib-3-19	241.141	bd	0.104031	0.00302053	0.873375	0.0355483	0.0608889	0.00173682	637.967	17.6363	637.398	19.2698	635.381	61.4214	100.089	100.407	637.967	17.6363
52	Nib-3-52	369.266	0.712881	0.104219	0.00340751	0.879395	0.0385307	0.0611977	0.001785	639.067	19.8924	640.656	20.8199	646.262	62.6945	99.752	98.8866	639.067	19.8924
17	Nib-3-17	172.119	1.43771	0.105251	0.00300714	0.864958	0.038123	0.0596028	0.00200028	645.089	17.5387	632.826	20.7591	589.261	72.8416	101.938	109.474	645.089	17.5387
84	Nib-3-84	208.591	0.0578888	0.105586	0.00254931	0.884443	0.0270763	0.060752	0.00114348	647.044	14.864	643.38	14.5904	630.536	40.5502	100.569	102.618	647.044	14.864
24	Nib-3-24	237.314	bd	0.10569	0.00228078	0.872514	0.0295965	0.0598737	0.00156698	647.649	13.297	636.932	16.0503	599.084	56.6959	101.683	108.107	647.649	13.297
9	Nib-3-09	99.9987	0.786127	0.10594	0.0029433	0.947529	0.0414273	0.0648682	0.00218989	649.104	17.1557	676.815	21.6022	770.135	71.1203	95.9057	84.2845	649.104	17.1557
38	Nib-3-38	228.53	bd	0.107025	0.00197883	0.905521	0.0235254	0.0613639	0.00111995	655.425	11.5228	654.674	12.5365	652.089	39.1769	100.115	100.512	655.425	11.5228
21	Nib-3-21	83.1983	bd	0.10747	0.00288012	0.941353	0.0455263	0.0635278	0.00255753	658.017	16.7642	673.59	23.8159	726.018	85.4445	97.688	90.6336	658.017	16.7642
16	Nib-3-16	232.273	bd	0.109586	0.00283023	0.93696	0.0356054	0.0620102	0.00172859	670.324	16.4424	671.29	18.667	674.529	59.638	99.8561	99.3766	670.324	16.4424
60	Nib-3-60	137.566	0.218076	0.109671	0.00325288	0.920528	0.0333138	0.0608755	0.00126231	670.817	18.8964	662.639	17.6148	634.913	44.6415	101.234	105.655	670.817	18.8964
73	Nib-3-73	53.4302	bd	0.110069	0.00367931	0.925945	0.0412931	0.0610126	0.00180104	673.126	21.366	665.499	21.7736	639.749	63.5195	101.146	105.217	673.126	21.366
31	Nib-3-31	305.706	0.320779	0.110585	0.00232239	0.947718	0.0258236	0.062156	0.00107912	676.12	13.48	676.913	13.4631	679.555	37.1027	99.8828	99.4946	676.12	13.48
77	Nib-3-77	271.522	bd	0.111153	0.00323893	0.952353	0.0321007	0.0621406	0.00105279	679.419	18.7903	679.327	16.6965	679.021	36.2062	100.014	100.059	679.419	18.7903
74	Nib-3-74	680.422	1.61265	0.111658	0.00346095	0.954431	0.0760598	0.0619948	0.00455143	682.345	20.0692	680.407	39.5353	674.005	157.504	100.285	101.237	682.345	20.0692
55	Nib-3-55	184.597	bd	0.112814	0.00310608	0.986505	0.0379925	0.0634214	0.00170783	689.046	17.9926	696.935	19.4219	722.461	57.1585	98.868	95.3749	689.046	17.9926
23	Nib-3-23	225.226	bd	0.113921	0.00250497	0.969388	0.0309493	0.0617153	0.00142856	695.456	14.4962	688.148	15.9583	664.334	49.6006	101.062	104.685	695.456	14.4962
64	Nib-3-64	114.887	0.0964105	0.115466	0.00360193	0.964097	0.0383878	0.0605569	0.00149849	704.394	20.8154	685.417	19.8479	623.603	53.3819	102.769	112.955	704.394	20.8154
22	Nib-3-22	645.534	1.1542	0.117452	0.00288986	1.02284	0.0397197	0.063161	0.00189755	715.856	16.6707	715.342	19.9402	713.725	63.8676	100.072	100.299	715.856	16.6707
14	Nib-3-14	418.396	0.198619	0.117771	0.00406152	1.05445	0.047657	0.064936	0.00189693	717.701	23.4229	731.085	23.558	772.338	61.5072	98.1693	92.9258	717.701	23.4229
35	Nib-3-35	215.018	bd	0.118023	0.00264947	1.00567	0.0290276	0.0617997	0.00112127	719.151	15.2761	706.682	14.6965	667.253	38.8527	101.764	107.778	719.151	15.2761
56	Nib-3-56	40.0702	bd	0.126482	0.00482925	1.15472	0.0657417	0.0662135	0.00279635	767.738	27.6352	779.468	30.9896	813.203	88.3961	98.4951	94.4091	767.738	27.6352
20	Nib-3-20	98.7999	bd	0.130557	0.00333961	1.17826	0.0466879	0.0654546	0.00198076	791.019	19.0418	790.504	21.7666	789.056	63.5529	100.065	100.249	791.019	19.0418
50	Nib-3-50	613.711	1.66705	0.1342	0.00339586	1.20383	0.08606	0.0650599	0.0043499	811.754	19.3004	802.354	39.671	776.343	140.982	101.172	104.561	811.754	19.3004
28	Nib-3-28	2099.15	7.19404	0.134415	0.00459027	2.34262	0.0991979	0.126402	0.00316476	812.976	26.084	1225.32	30.1421	2048.58	44.241	66.3482	39.6848	-	-
26	Nib-3-26	184.371	bd	0.134832	0.00346236	1.23213	0.0428722	0.0662771	0.00155615	815.345	19.6674	815.309	19.5047	815.206	49.0952	100.004	100.017	815.345	19.6674
78	Nib-3-78	183.314	1.07189	0.140766	0.00322516	1.17546	0.06708	0.0605632	0.00316537	848.968	18.2247	789.199	31.319	623.832	112.891	107.573	136.089	848.968	18.2247
82	Nib-3-82	71.6322	bd	0.144496	0.0037633	1.35971	0.0516129	0.0682479	0.00188463	870.01	21.1963	871.747	22.2125	876.164	57.1918	99.8007	99.2976	870.01	21.1963
36	Nib-3-36	215.878	0.263193	0.146303	0.00293839	1.38072	0.0383661	0.0684462	0.00131436	880.179	16.524	880.744	16.3647	882.163	39.7253	99.9358	99.7751	880.179	16.524
51	Nib-3-51	899.123	14.4422	0.147395	0.00338653	1.41407	0.134539	0.0695804	0.00642416	886.316	19.026	894.872	56.6472	916.066	190.845	99.0439	96.7524	886.316	19.026
66	Nib-3-66	151.29	0.465321	0.150065	0.00502441	1.42253	0.0599283	0.0687513	0.00175787	901.298	28.1624	898.423	25.1236	891.356	52.824	100.32	101.115	901.298	28.1624
86	Nib-3-86	82.7061	bd	0.155523	0.00335823	1.43196	0.0474761	0.0667785	0.00168006	931.817	18.7343	902.37	19.8246	830.941	52.4759	103.263	112.14	931.817	18.7343
58	Nib-3-58	144.054	bd	0.156481	0.00328008	1.43479	0.0444549	0.0665007	0.00151731	937.161	18.2832	903.55	18.5411	822.244	47.6503	103.72	113.976	937.161	18.2832
30	Nib-3-30	206.631	0.00726905	0.157126	0.00313689	1.49984	0.0386662	0.0692299	0.00112923	940.758	17.4753	930.321	15.7067	905.671	33.617	101.122	103.874	940.758	17.4753
6	Nib-3-06	340.911	bd	0.157213	0.00408983	1.56142	0.0523705	0.0720328	0.00152498	941.239	22.7823	955.03	20.7633	986.934	43.0918	98.5559	95.37	941.239	22.7823
18	Nib-3-18	122.189	0.392676	0.158187	0.00455254	1.53859	0.0616489	0.0705426	0.00196664	946.661	25.3385	945.939	24.6631	944.257	57.1299	100.076	100.255	946.661	25.3385
62	Nib-3-62	77.5592	0.230589	0.163109	0.00555617	1.60868	0.0724354	0.0715304	0.00210637	973.999	30.7938	973.594	28.2015	972.676	60.0863	100.042	100.136	973.999	30.7938
61	Nib-3-61	122.442	1.81416	0.170263	0.00700981	1.53501	0.0884821	0.0653868	0.00263798	1013.53	38.6129	944.509	35.4553	786.881	84.7912	107.308	128.803	1013.53	38.6129
75	Nib-3-75	71.2361	0.611621	0.176464	0.00592976	1.76319	0.0744535	0.0724672	0.0018531	1047.6	32.4912	1032.02	27.3658	999.16	51.9562	101.509	104.848	1047.6	32.4912
25	Nib-3-25	445.135	0.0927761	0.178777	0.0045377	1.85062	0.0600211	0.0750764	0.00151584	1060.25	24.8148	1063.65	21.3826	1070.62	40.5788	99.6809	99.032	1060.25	24.8148
54	Nib-3-54	252.849	bd	0.184688	0.00412041	1.80012	0.0527925	0.0706906	0.00134562	1092.5	22.4203	1045.5	19.1459	948.548	38.9719	104.495	115.176	1092.5	22.4203
80	Nib-3-80	47.939	0.0124275	0.204628	0.00880542	2.26644	0.139593	0.0803299	0.00353981	1200.1	47.1204	1201.91	43.4194	1205.17	86.894	99.8491	99.5787	1205.17	86.894
8	Nib-3-08	329.22	0.118131	0.205641	0.00510019	2.29205	0.0709367	0.0808376	0.00149655	1205.52	27.2693	1209.84	21.8827	1217.57	36.4065	99.6425	99.0099	1217.57	36.4065
5	Nib-3-05	188.519	0.335283	0.211174	0.00568324	3.03889	0.106837	0.104369	0.00236089	1235.03	30.248	1417.44	26.8651	1703.3	41.6613	87.1308	72.5083	-	-
83	Nib-3-83	182.049	0.934913	0.211174	0.00502691	2.46924	0.0910666	0.0848049	0.00238889	1235.03	26.7548	1263.07	26.6597	1311.15	54.6789	97.78	94.1942	1311.15	26.7548
49	Nib-3-49	277.264	bd	0.296775	0.00632545	4.50825	0.135205	0.110174	0.00232453	1675.24	31.4438	1732.49	24.9286	1802.34	38.3806	96.6954	92.948	1802.34	38.3806
85	Nib-3-85	138.257	bd	0.308142	0.00716476	4.49919	0.120724	0.105897	0.00141814	1731.5	35.3066	1730.82	22.2942	1730	24.5762	100.039	100.087	1730	24.5762
72	Nib-3-72	659.311	3.02723	0.311759	0.0235414	4.83299	0.371988	0.112433	0.00167583	1749.3	115.699	1790.66	64.8421	1839.18	26.989	97.6904	95.1128	1839.18	26.989
12	Nib-3-12	2381.63	11.1622	0.322038	0.0211243	5.20645	0.519788	0.117255	0.00882486	1799.62	103.01	1853.67	85.2377	1914.88	135.398	97.0839	93.9808	1914.88	135.398
69	Nib-3-69	621.577	0.013533	0.330045	0.0128264	5.07572	0.217998	0.111538	0.00203942	1838.54	62.1665	1832.06	36.4477	1824.7	33.1688	100.354	100.759	1824.7	33.1688
39	Nib-3-39	710.717	2.0193	0.330607	0.00712874	6.15306	0.162116	0.134983	0.00204367	1841.26	34.536	1997.81	23.0164	2163.85	26.4072	92.1642	85.0918	-	-
27	Nib-3-27	595.543	bd	0.3331	0.0062939	5.25354	0.148274	0.114387	0.00239818	1853.33	30.4344	1861.35	24.0797	1870.31	37.8227	99.5694	99.0921	1870.31	37.8227
53	Nib-3-53	183.65	0.369309	0.351484	0.00677484	5.43967	0.14479	0.112245	0.00206043	1941.62	32.3144	1891.13	22.8338	1836.14	33.2546	102.67	105.744	1836.14	33.2546
15	Nib-3-15	525.598	0.153733	0.456983	0.0127872	10.6451	0.398	0.168945	0.00418939	2426.15	56.5763	2492.65	34.7169	2547.29	41.5611	97.3322	95.2443	2547.29	41.5611
79	Nib-3-79	79.9318	bd	0.459615	0.011797	10.8436	0.312742	0.171111	0.00225067	2437.78	52.1012	2509.81	26.8185	2568.6	21.9965	97.13	94.9068	2568.6	21.9965
13	Nib-3-13	840.475	bd	0.467636	0.0109432	10.4389	0.344709	0.161899	0.003772	2473.11	48.0661	2474.5	30.6078	2475.65	39.3248	99.9435	99.8974	2475.65	39.3248
29	Nib-3-29	183.142	0.000150371	0.492647	0.0131498	12.2244	0.423154	0.179965	0.00396647	2582.04	56.7908	2621.78	32.5014	2652.62	36.5591	98.4841	97.3391	2652.62	36.5591
65	Nib-3-65	115.442	0.0303559	0.507212	0.0171816	12.6933	0.473018	0.181503	0.00281891	2644.63	73.4872	2657.16	35.0891	2666.72	25.7254	99.5284	99.1717	2666.72	25.7254
76	Nib-3-76	70.1963	bd	0.640568	0.0187269	15.7146	0.522029	0.177925	0.00280671	3191.15	73.586	2859.61	31.7226	2633.69	26.2117	111.594	121.166	-	-
67	Nib-3-67	167.664	0.108893	0.663294	0.0190266	16.1444	0.528906	0.176528	0.00279369	3279.83	73.7419	2885.39	31.3346	2620.59	26.3309	113.67	125.156	-	-
Eda-9
				Isotope ratios						Ages (Ma)						Data filter A*	Data filter B#	quoted age	±2σ
#	Spot	U [ppm]	ƒ206%	206Pb/238U	±2σ	207Pb/235U	±2σ	207Pb/206Pb	±2σ	206Pb/238U	±2σ	207Pb/235U	±2σ	207Pb/206Pb	±2σ
89	Eda-9-89	2186.15	4.96197	0.0035367	0.00599629	0.0285248	0.0483938	0.0584955	0.00358088	22.7581	38.5176	28.5582	47.8107	548.444	133.996	79.6902	4.14957	-	-
81	Eda-9-81	137.391	0.458099	0.0201411	0.00363773	0.171802	0.0318346	0.0618649	0.00256161	128.544	22.9867	160.982	27.5919	669.513	88.706	79.8497	19.1996	-	-
83	Eda-9-83	1.18075	130.831	0.0249256	0.0322959	3.57909	4.66972	1.04142	0.159576	158.706	203.19	-	-	5294.4	216.699	-	2.99761	-	-
42	Eda-9-42	648.486	0.0428208	0.0403751	0.00166247	0.294922	0.0144101	0.0529775	0.00139356	255.15	10.3008	262.426	11.2998	327.907	59.7239	97.2273	77.8117	-	-
50	Eda-9-50	420.432	bd	0.0417039	0.00150363	0.323916	0.0144887	0.0563319	0.00149125	263.378	9.30466	284.911	11.1126	465.55	58.67	92.4422	56.5734	-	-
24	Eda-9-24	1109.12	2.75532	0.0499959	0.00218104	0.438158	0.021847	0.0635616	0.00153477	314.487	13.39	368.953	15.4259	727.143	51.2123	85.2376	43.2496	-	-
27	Eda-9-27	697.522	2.28419	0.0631663	0.00292409	0.8	0.041225	0.0918551	0.00207949	394.84	17.7295	596.828	23.2591	1464.46	43.0202	66.1564	26.9615	-	-
38	Eda-9-38	489.707	0.34043	0.0718746	0.00264168	0.5808	0.0245416	0.0586071	0.0012218	447.425	15.887	464.976	15.7649	552.602	45.5093	96.2255	80.967	447.425	15.887
25	Eda-9-25	861.478	bd	0.0808805	0.0021744	0.661484	0.0310619	0.0593164	0.00228371	501.36	12.9678	515.522	18.9851	578.799	83.7278	97.2529	86.6207	501.36	12.9678
53	Eda-9-53	201.552	0.544521	0.0814125	0.00211979	0.643885	0.0218781	0.0573609	0.00125222	504.532	12.6359	504.709	13.5143	505.509	48.0413	99.965	99.8067	504.532	12.6359
79	Eda-9-79	82.8643	bd	0.0818751	0.00319517	0.651039	0.0351546	0.0576705	0.00215228	507.289	19.038	509.118	21.6232	517.335	82.0065	99.6408	98.0582	507.289	19.038
72	Eda-9-72	57.5674	0.161383	0.0857756	0.00343019	0.686586	0.0395138	0.0580536	0.0024027	530.488	20.3649	530.747	23.7931	531.859	90.7373	99.9512	99.7421	530.488	20.3649
1	Eda-9-1	226.817	13.4277	0.0890694	0.0031559	0.541643	0.227574	0.0441045	0.0184648	550.014	18.6798	439.507	150.992	-	-	125.143	-	-	-
88	Eda-9-88	192.622	0.0178856	0.0891174	0.00336853	0.737307	0.034264	0.0600046	0.00162221	550.298	19.9375	560.833	20.0285	603.814	58.5222	98.1216	91.1369	550.298	19.9375
28	Eda-9-28	164.143	0.303093	0.0893626	0.0024567	0.867361	0.0387133	0.0703952	0.00247524	551.748	14.5373	634.133	21.0535	939.975	72.1216	87.0083	58.6982	-	-
33	Eda-9-33	63.016	0.485219	0.0905727	0.0038035	0.73389	0.0476718	0.0587669	0.00291238	558.905	22.482	558.834	27.9241	558.543	108.209	100.013	100.065	558.905	22.482
47	Eda-9-47	99.6446	bd	0.0911841	0.0035035	0.739675	0.0356883	0.058833	0.00171694	562.518	20.6971	562.216	20.8329	560.994	63.6339	100.054	100.272	562.518	20.6971
35	Eda-9-35	217.368	0.258805	0.0918295	0.00344263	0.747131	0.0345248	0.0590083	0.00159421	566.329	20.3255	566.558	20.0675	567.479	58.8369	99.9596	99.7974	566.329	20.3255
51	Eda-9-51	55.291	0.520547	0.0921021	0.00379706	0.705936	0.039791	0.0555897	0.00213679	567.939	22.4125	542.33	23.6881	436.091	85.6638	104.722	130.234	567.939	22.4125
46	Eda-9-46	252.661	0.219552	0.0933995	0.00344224	0.761682	0.0326288	0.0591464	0.00129148	575.593	20.294	574.98	18.8084	572.562	47.5073	100.106	100.529	575.593	20.294
64	Eda-9-64	25.8539	bd	0.0936382	0.00295727	0.753801	0.0440329	0.0583851	0.00286911	577	17.431	570.427	25.4987	544.314	107.555	101.152	106.005	577	17.431
80	Eda-9-80	114.585	bd	0.0949962	0.00339509	0.783054	0.0401722	0.059784	0.00220033	584.999	19.9869	587.224	22.8804	595.841	79.8082	99.621	98.1803	584.999	19.9869
68	Eda-9-68	802.22	1.00103	0.0961257	0.00455061	0.786898	0.0451332	0.0593715	0.00192256	591.645	26.7619	589.411	25.6518	580.821	70.3764	100.379	101.864	591.645	26.7619
23	Eda-9-23	202.441	0.00884831	0.0961952	0.00186012	0.81267	0.0243236	0.0612717	0.00139978	592.054	10.9385	603.951	13.6259	648.856	49.0761	98.0301	91.2458	592.054	10.9385
58	Eda-9-58	74.0694	0.975183	0.0971863	0.00304488	0.826426	0.0394795	0.0616734	0.0022241	597.879	17.8894	611.627	21.9516	662.875	77.3239	97.7521	90.1948	597.879	17.8894
69	Eda-9-69	527.506	bd	0.0993071	0.00180775	0.835795	0.0232138	0.0610405	0.00128047	610.327	10.6004	616.823	12.8403	640.74	45.1231	98.9469	95.2534	610.327	10.6004
67	Eda-9-67	241.864	bd	0.0993522	0.00297387	0.833935	0.035458	0.060877	0.00183834	610.592	17.4378	615.793	19.6342	634.961	65.0358	99.1554	96.1621	610.592	17.4378
6	Eda-9-6	356.015	bd	0.100542	0.00392249	0.975912	0.0437845	0.0703982	0.00155966	617.565	22.9753	691.507	22.5037	940.061	45.4187	89.3072	65.6942	-	-
63	Eda-9-63	69.9023	0.774847	0.100913	0.00269002	0.839897	0.0428294	0.0603638	0.0026241	619.738	15.751	619.089	23.6405	616.717	93.9608	100.105	100.49	619.738	15.751
70	Eda-9-70	418.465	0.224929	0.101377	0.00189663	0.848335	0.0290107	0.0606911	0.00173733	622.456	11.1007	623.735	15.9383	628.381	61.7123	99.7949	99.0571	622.456	11.1007
82	Eda-9-82	397.705	0.0212188	0.101491	0.004538	0.870668	0.0442555	0.0622191	0.00150404	623.121	26.5577	635.93	24.026	681.72	51.6462	97.9858	91.4043	623.121	26.5577
75	Eda-9-75	56.7297	bd	0.101908	0.00570317	0.947212	0.0832934	0.067412	0.00457244	625.561	33.3641	676.65	43.4602	850.606	141.344	92.4497	73.543	625.561	33.3641
15	Eda-9-15	470.083	0.0440923	0.102139	0.00197692	0.84856	0.0204927	0.0602543	0.000870257	626.914	11.5627	623.858	11.2568	612.788	31.2042	100.49	102.305	626.914	11.5627
62	Eda-9-62	59.7534	0.377108	0.10233	0.0025696	0.860627	0.0403445	0.0609972	0.00241459	628.031	15.0266	630.465	22.0203	639.205	85.2203	99.6139	98.2519	628.031	15.0266
87	Eda-9-87	732.925	0.0610531	0.10331	0.00367997	0.855178	0.0352967	0.0600361	0.00125176	633.758	21.5007	627.487	19.3211	604.949	45.1136	100.999	104.762	633.758	21.5007
7	Eda-9-7	295.913	0.0368653	0.105685	0.00231078	0.897367	0.0242239	0.0615825	0.000974924	647.616	13.472	650.319	12.9642	659.709	33.9413	99.5843	98.1669	647.616	13.472
5	Eda-9-5	179.67	0.614164	0.106117	0.0024206	0.87347	0.0270964	0.0596983	0.00125509	650.136	14.1068	637.45	14.6867	592.732	45.5856	101.99	109.685	650.136	14.1068
41	Eda-9-41	434.841	0.188641	0.107486	0.00394026	0.982887	0.0427122	0.0663211	0.00154767	658.108	22.9347	695.084	21.8751	816.598	48.7852	94.6803	80.5915	658.108	22.9347
20	Eda-9-20	747.217	1.5113	0.109173	0.00424103	0.926585	0.0452933	0.0615557	0.00182642	667.922	24.6478	665.837	23.8757	658.784	63.6482	100.313	101.387	667.922	24.6478
30	Eda-9-30	44.2664	2.20972	0.109266	0.00366455	0.720125	0.069853	0.0477992	0.00435063	668.464	21.2956	550.741	41.2566	89.4213	146.027	121.375	747.544	-	-
73	Eda-9-73	102.599	0.693284	0.11147	0.00378187	0.958098	0.0469647	0.0623377	0.00220553	681.257	21.9339	682.31	24.3585	685.792	75.5739	99.8456	99.3387	681.257	21.9339
17	Eda-9-17	216.311	1.34342	0.111871	0.00199764	0.905818	0.0250068	0.0587247	0.0012364	683.585	11.5816	654.832	13.3239	556.979	45.929	104.391	122.731	683.585	11.5816
22	Eda-9-22	191.749	0.156484	0.11306	0.00211587	0.970984	0.0270662	0.0622879	0.00128678	690.47	12.254	688.971	13.9444	684.075	44.117	100.218	100.935	690.47	12.254
11	Eda-9-11	123.543	0.0805461	0.117191	0.00255862	1.02652	0.0313863	0.0635291	0.00135985	714.352	14.7633	717.187	15.7273	726.066	45.3997	99.6048	98.3868	714.352	14.7633
43	Eda-9-43	68.54	bd	0.117222	0.00454342	1.04621	0.0648564	0.0647304	0.00313172	714.531	26.215	727.003	32.1942	765.662	102.067	98.2845	93.322	714.531	26.215
49	Eda-9-49	238.889	0.15607	0.117264	0.00412408	1.05108	0.0409723	0.0650084	0.00109295	714.774	23.7946	729.417	20.286	774.674	35.3765	97.9926	92.2677	714.774	23.7946
66	Eda-9-66	311.26	0.110862	0.117788	0.00255101	1.04009	0.0325662	0.0640427	0.00144816	717.795	14.7115	723.963	16.2101	743.117	47.8315	99.1481	96.5924	717.795	14.7115
45	Eda-9-45	176.656	1.86886	0.118074	0.00446076	1.01707	0.058071	0.0624735	0.0026745	719.445	25.7185	712.44	29.2407	690.427	91.4049	100.983	104.203	719.445	25.7185
57	Eda-9-57	264.727	0.0133627	0.120459	0.00325933	1.07443	0.0405224	0.0646896	0.00169968	733.184	18.7515	740.909	19.8373	764.327	55.3894	98.9573	95.9254	733.184	18.7515
14	Eda-9-14	131.491	bd	0.120929	0.00250275	1.09116	0.032289	0.0654417	0.00138411	735.886	14.3928	749.066	15.6795	788.636	44.4078	98.2405	93.3112	735.886	14.3928
34	Eda-9-34	108.53	0.898773	0.121666	0.00478969	1.09318	0.0609447	0.0651658	0.00257242	740.121	27.5265	750.045	29.5722	779.767	83.0555	98.6769	94.9157	740.121	27.5265
19	Eda-9-19	51.9875	0.47701	0.122888	0.00259264	1.20597	0.0504049	0.0711747	0.00256803	747.14	14.8837	803.337	23.2049	962.51	73.7476	93.0045	77.6241	747.14	14.8837
78	Eda-9-78	180.756	bd	0.124386	0.00395709	1.12789	0.0439825	0.0657651	0.00148309	755.735	22.6864	766.749	20.9904	798.974	47.2736	98.5636	94.5882	755.735	22.6864
8	Eda-9-8	75.6645	1.6188	0.126429	0.00308624	1.10579	0.0493308	0.0634345	0.00236865	767.436	17.6616	756.147	23.791	722.899	79.2837	101.493	106.161	767.436	17.6616
26	Eda-9-26	118.353	bd	0.126515	0.00244249	1.17026	0.0367299	0.0670868	0.00166014	767.931	13.9766	786.765	17.1862	840.535	51.5318	97.6061	91.3621	767.931	13.9766
52	Eda-9-52	172.889	bd	0.128403	0.00332916	1.1503	0.0398394	0.0649731	0.00149194	778.725	19.0185	777.385	18.8145	773.54	48.3322	100.172	100.67	778.725	19.0185
36	Eda-9-36	78.6044	0.463788	0.128544	0.00457742	1.16519	0.0543299	0.0657418	0.00197891	779.531	26.1462	784.39	25.4838	798.24	63.1189	99.3805	97.6563	779.531	26.1462
48	Eda-9-48	330.27	bd	0.129229	0.00466135	1.19443	0.0476185	0.0670346	0.00113823	783.44	26.6095	798.012	22.037	838.923	35.3622	98.174	93.3863	783.44	26.6095
54	Eda-9-54	93.4295	bd	0.129449	0.00362772	1.27446	0.0480004	0.0714044	0.00179673	784.699	20.7049	834.384	21.4319	969.081	51.3601	94.0453	80.9735	784.699	20.7049
56	Eda-9-56	155.627	0.171563	0.12962	0.0031471	1.20585	0.0438403	0.0674714	0.00182584	785.673	17.959	803.283	20.1829	852.427	56.2525	97.8078	92.1689	785.673	17.959
55	Eda-9-55	184.967	bd	0.130071	0.00335788	1.22342	0.0439071	0.0682171	0.00170073	788.244	19.1543	811.337	20.054	875.23	51.6367	97.1537	90.0614	788.244	19.1543
76	Eda-9-76	286.563	bd	0.130647	0.00422855	1.14248	0.0458266	0.0634233	0.00150269	791.53	24.1085	773.686	21.7219	722.528	50.2872	102.306	109.55	791.53	24.1085
10	Eda-9-10	26.738	bd	0.131206	0.00426063	1.16202	0.0570043	0.0642331	0.00236185	794.714	24.2794	782.902	26.7781	749.383	77.734	101.509	106.049	794.714	24.2794
61	Eda-9-61	38.5611	0.230571	0.133365	0.0042343	1.2346	0.0674117	0.0671402	0.00298253	807.009	24.0834	816.431	30.6406	842.195	92.5589	98.8459	95.8221	807.009	24.0834
65	Eda-9-65	82.8881	0.367612	0.134518	0.00288213	1.29823	0.054535	0.0699956	0.0025291	813.561	16.376	844.941	24.0987	928.292	74.2435	96.2862	87.6406	813.561	16.376
60	Eda-9-60	166.121	2.5124	0.134521	0.00366959	1.15692	0.0686731	0.0623747	0.00328836	813.582	20.8502	780.504	32.3393	687.051	112.686	104.238	118.417	813.582	20.8502
71	Eda-9-71	101.929	0.0510633	0.135342	0.00467835	1.24264	0.0539192	0.0665899	0.00174654	818.245	26.5627	820.076	24.4174	825.047	54.7552	99.7767	99.1755	818.245	26.5627
84	Eda-9-84	234.601	0.0211211	0.138405	0.00546189	1.29781	0.0577672	0.0680077	0.00140023	835.612	30.9281	844.756	25.5322	868.859	42.6817	98.9175	96.1734	835.612	30.9281
31	Eda-9-31	32.5688	bd	0.142946	0.00335075	1.35385	0.0611441	0.0686908	0.0026517	861.272	18.8983	869.222	26.3817	889.535	79.813	99.0853	96.8227	861.272	18.8983
13	Eda-9-13	55.824	bd	0.144825	0.00418834	1.32621	0.0572251	0.0664153	0.00212684	871.861	23.5835	857.228	24.9836	819.564	66.9289	101.707	106.381	871.861	23.5835
2	Eda-9-2	150.382	bd	0.145906	0.00324376	1.3278	0.0415942	0.0660021	0.00145661	877.944	18.2476	857.92	18.1453	806.518	46.2055	102.334	108.856	877.944	18.2476
12	Eda-9-12	111.855	0.291003	0.153653	0.00568956	1.48362	0.0664137	0.070029	0.00176157	921.38	31.7915	923.709	27.1585	929.275	51.6605	99.7478	99.1505	921.38	31.7915
74	Eda-9-74	442.349	0.173365	0.165473	0.00555842	1.7331	0.0690903	0.0759619	0.00163073	987.089	30.7437	1020.9	25.6734	1094.14	42.9964	96.6877	90.2162	987.089	30.7437
18	Eda-9-18	117.91	bd	0.175319	0.00419505	1.71066	0.0529555	0.0707678	0.00138987	1041.32	23.0085	1012.53	19.839	950.789	40.1974	102.843	109.521	1041.32	23.0085
44	Eda-9-44	679.829	0.186473	0.19291	0.00808709	2.06588	0.0919406	0.077669	0.00116044	1137.08	43.7014	1137.57	30.4588	1138.49	29.7213	99.9575	99.8763	1137.08	43.7014
3	Eda-9-3	408.558	0.0820033	0.197089	0.00418075	2.10151	0.0517299	0.0773333	0.000965763	1159.63	22.513	1149.3	16.9371	1129.87	24.8766	100.899	102.634	1159.63	22.513
39	Eda-9-39	161.542	bd	0.289225	0.0101172	4.60787	0.178786	0.115548	0.00193976	1637.6	50.5879	1750.69	32.3827	1888.52	30.2172	93.5402	86.7136	-	-
59	Eda-9-59	226.456	bd	0.300186	0.00729407	4.57472	0.141838	0.110528	0.00212856	1692.18	36.1637	1744.67	25.84	1808.18	35.0046	96.991	93.5845	1808.18	35.0046
37	Eda-9-37	347.578	bd	0.317083	0.014342	4.57085	0.221171	0.104549	0.00179723	1775.41	70.1968	1743.97	40.3335	1706.47	31.6429	101.803	104.04	1706.47	31.6429
4	Eda-9-4	1201.42	0.598655	0.325918	0.013229	6.31389	0.270981	0.140504	0.00195917	1818.51	64.3173	2020.38	37.6373	2233.49	24.1327	90.0079	81.4199	-	-
86	Eda-9-86	90.1335	bd	0.331336	0.0126953	5.1791	0.231756	0.113366	0.00262052	1844.79	61.4716	1849.19	38.1013	1854.14	41.79	99.7624	99.496	1854.14	41.79
16	Eda-9-16	325.804	0.0426904	0.331478	0.00843295	5.19442	0.145777	0.113653	0.00134657	1845.48	40.8278	1851.7	23.9	1858.7	21.4005	99.6641	99.289	1859	21
21	Eda-9-21	517.695	0.0228651	0.337792	0.00803539	7.66365	0.199983	0.164545	0.00176516	1875.98	38.7193	2192.35	23.4422	2502.98	18.0531	85.5692	74.9497	-	-
85	Eda-9-85	306.446	0.00277303	0.339921	0.0120212	5.29707	0.209195	0.11302	0.00198675	1886.23	57.834	1868.39	33.7445	1848.61	31.7955	100.955	102.035	1848.61	31.7955
32	Eda-9-32	183.663	0.084546	0.391133	0.00637313	6.66232	0.140286	0.123538	0.00164768	2128.01	29.5319	2067.64	18.5923	2008	23.675	102.92	105.976	2008	23.675
77	Eda-9-77	580.091	0.198555	0.438979	0.0195477	9.34919	0.456603	0.154465	0.0030982	2345.99	87.5735	2372.86	44.8275	2396.02	34.1272	98.8678	97.9122	2396.02	34.1272
9	Eda-9-9	207.447	0.0765495	0.454648	0.0101787	10.0785	0.245916	0.160776	0.00155988	2415.81	45.1072	2442.01	22.5427	2463.91	16.3937	98.9271	98.0477	2463.91	16.3937
29	Eda-9-29	115.436	bd	0.509315	0.0104098	11.7252	0.296329	0.166967	0.00248202	2653.62	44.4603	2582.71	23.6494	2527.54	24.9577	102.745	104.988	2527.54	24.9577
40	Eda-9-40	0.135203	bd	2.46208	0.666672	213.459	73.2107	0.628797	0.132363	8005.35	1257	5450.7	361.118	4576.06	310.04	146.868	174.94	-	-
Eda-11
				Isotope ratios						Ages (Ma)						Data filter A*	Data filter B#	quoted age	±2σ
#	Spot	U [ppm]	ƒ206%	206Pb/238U	±2σ	207Pb/235U	±2σ	207Pb/206Pb	±2σ	206Pb/238U	±2σ	207Pb/235U	±2σ	207Pb/206Pb	±2σ
55	Eda-11-55	495.133	1.76241	0.0397747	0.00266952	0.356788	0.0251956	0.0650582	0.00142881	251.428	16.55	309.814	18.8579	776.296	46.2055	81.1546	32.3882	-	-
8	Eda-11-08	40.6588	0.406825	0.0845346	0.00337096	0.651692	0.0405181	0.0559122	0.00266708	523.116	20.0362	509.519	24.9136	448.956	106.12	102.668	116.518	523.116	20.0362
27	Eda-11-27	592.777	0.226361	0.0871828	0.00319221	0.779696	0.0332553	0.0648625	0.00141882	538.837	18.9275	585.31	18.9756	769.954	46.0672	92.0601	69.983	538.837	18.9275
77	Eda-11-77	85.316	0.118155	0.0881877	0.00414496	0.737205	0.0416545	0.0606288	0.00190135	544.792	24.554	560.773	24.3514	626.159	67.6394	97.1502	87.0055	544.792	24.554
3	Eda-11-03	300.852	1.75514	0.0887922	0.00248824	0.708194	0.0519498	0.0578464	0.0039215	548.372	14.7317	543.673	30.8895	524.02	149.083	100.864	104.647	548.372	14.7317
47	Eda-11-47	84.181	bd	0.0897306	0.00330769	0.73302	0.0365259	0.059248	0.00198647	553.926	19.5664	558.324	21.4039	576.291	72.9275	99.2123	96.1191	553.926	19.5664
33	Eda-11-33	573.851	bd	0.0900289	0.00172473	0.736554	0.0206159	0.0593364	0.00121083	555.69	10.1997	560.393	12.0549	579.534	44.3411	99.1608	95.8858	555.69	10.1997
9	Eda-11-09	452.369	1.36605	0.0913992	0.00285895	0.745591	0.033273	0.0591639	0.00188313	563.788	16.8861	565.663	19.3567	573.211	69.2654	99.6686	98.3562	563.788	16.8861
75	Eda-11-75	34.2925	4.88602	0.0916144	0.00388058	0.62022	0.0657091	0.0490999	0.00476804	565.06	22.9157	489.985	41.2021	152.678	182.8	115.322	370.098	-	-
39	Eda-11-39	29.0214	3.91787	0.0916325	0.00337094	0.506883	0.0903292	0.0401197	0.00699553	565.166	19.9058	416.351	60.9396	-	-	135.743	-	-	-
10	Eda-11-10	201.492	bd	0.0944808	0.00267664	0.764523	0.0313246	0.0586875	0.00173717	581.964	15.7648	576.616	18.0274	555.596	64.6019	100.927	104.746	581.964	15.7648
63	Eda-11-63	47.5255	0.0219708	0.0960496	0.00316711	0.791146	0.0401173	0.0597393	0.00230133	591.197	18.6268	591.822	22.7459	594.22	83.5609	99.8945	99.4913	591.197	18.6268
73	Eda-11-73	210.062	bd	0.0962939	0.0029926	0.800378	0.0314018	0.060283	0.00144359	592.634	17.5965	597.042	17.7119	613.818	51.7464	99.2617	96.5488	592.634	17.5965
18	Eda-11-18	199.076	bd	0.0963022	0.00343517	0.796288	0.0355227	0.0599698	0.00160657	592.683	20.1987	594.732	20.0825	602.555	58.0025	99.6554	98.3616	592.683	20.1987
59	Eda-11-59	182.546	0.0041421	0.0981256	0.00260676	0.807428	0.0255089	0.0596788	0.00102045	603.396	15.3022	601.01	14.3314	592.017	37.0789	100.397	101.922	603.396	15.3022
12	Eda-11-12	99.822	0.919233	0.0991452	0.00370328	0.824209	0.0399821	0.0602927	0.00186616	609.378	21.7189	610.394	22.2582	614.171	66.8907	99.8335	99.2195	609.378	21.7189
15	Eda-11-15	338.891	0.0744865	0.100164	0.00344794	0.837859	0.0371264	0.0606676	0.00169276	615.351	20.2027	617.963	20.5144	627.542	60.1625	99.5773	98.0575	615.351	20.2027
43	Eda-11-43	296.574	0.523991	0.100821	0.00345233	0.945841	0.0362325	0.0680403	0.00116847	619.198	20.2163	675.935	18.9091	869.851	35.5911	91.6062	71.1844	619.198	20.2163
38	Eda-11-38	96.7349	bd	0.100856	0.00230351	0.866405	0.0497931	0.062304	0.00328577	619.406	13.4885	633.613	27.0954	684.628	112.772	97.7578	90.4734	619.406	13.4885
31	Eda-11-31	166.938	bd	0.101044	0.00199315	0.841256	0.027693	0.0603832	0.00159135	620.504	11.6692	619.838	15.2728	617.404	56.9201	100.107	100.502	620.504	11.6692
64	Eda-11-64	174.37	0.0680018	0.101279	0.00253792	0.837648	0.0280848	0.0599847	0.00133619	621.88	14.8554	617.847	15.5193	603.099	48.2178	100.653	103.114	621.88	14.8554
34	Eda-11-34	171.568	0.144372	0.102659	0.00202122	0.852572	0.0264863	0.0602325	0.00144743	629.955	11.8162	626.06	14.5179	612.006	51.9419	100.622	102.933	629.955	11.8162
85	Eda-11-85	417.603	0.0191984	0.103414	0.00444448	0.875379	0.0414605	0.0613928	0.00122195	634.362	25.9651	638.484	22.4516	653.1	42.7246	99.3544	97.1309	634.362	25.9651
44	Eda-11-44	39.1567	1.01884	0.10348	0.0037755	0.869252	0.0574478	0.0609237	0.0033572	634.752	22.0554	635.161	31.2157	636.611	118.79	99.9357	99.708	634.752	22.0554
79	Eda-11-79	118.572	bd	0.103909	0.00438055	0.884622	0.0455007	0.0617453	0.00181945	637.255	25.5801	643.476	24.5193	665.374	63.1428	99.0332	95.774	637.255	25.5801
42	Eda-11-42	182.982	0.454611	0.104252	0.00337289	0.985016	0.0381263	0.0685265	0.00145599	639.257	19.6898	696.174	19.5049	884.595	43.9358	91.8243	72.2655	639.257	19.6898
53	Eda-11-53	132.041	0.267941	0.104384	0.00307497	0.877859	0.034593	0.0609941	0.00159643	640.032	17.9484	639.826	18.707	639.1	56.324	100.032	100.146	640.032	17.9484
37	Eda-11-37	49.9754	bd	0.104694	0.0023507	0.88134	0.0394101	0.0610551	0.00236102	641.836	13.717	641.706	21.2732	641.246	83.2224	100.02	100.092	641.836	13.717
4	Eda-11-04	270.851	0.0618961	0.105774	0.0031628	0.885805	0.0355607	0.0607379	0.00162696	648.135	18.4379	644.113	19.1494	630.04	57.7307	100.624	102.872	648.135	18.4379
20	Eda-11-20	96.2389	bd	0.106162	0.00362267	0.895864	0.0391554	0.0612028	0.00167146	650.399	21.1114	649.515	20.9738	646.443	58.6987	100.136	100.612	650.399	21.1114
22	Eda-11-22	339.992	0.507809	0.10733	0.0036626	0.948714	0.0419737	0.0641081	0.00180521	657.202	21.3216	677.433	21.8739	745.273	59.5522	97.0136	88.1828	657.202	21.3216
72	Eda-11-72	138.574	bd	0.108784	0.00312225	0.931378	0.0365586	0.0620954	0.00166268	665.661	18.1521	668.359	19.2222	677.466	57.2538	99.5963	98.2574	665.661	18.1521
16	Eda-11-16	114.138	bd	0.10991	0.00363958	0.928143	0.0415411	0.0612458	0.00184416	672.203	21.1383	666.657	21.8795	647.95	64.7116	100.832	103.743	672.203	21.1383
45	Eda-11-45	292.879	1.29152	0.11165	0.00350337	0.896568	0.0408408	0.0582404	0.00192319	682.3	20.3153	649.892	21.8687	538.888	72.2837	104.987	126.613	682.3	20.3153
56	Eda-11-56	123.905	bd	0.112405	0.00344251	0.963925	0.0390024	0.062195	0.00164463	686.679	19.9489	685.328	20.1676	680.89	56.51	100.197	100.85	686.679	19.9489
69	Eda-11-69	388.228	0.326666	0.113084	0.003605	1.03796	0.0386972	0.0665695	0.00128687	690.614	20.8777	722.9	19.2827	824.409	40.3547	95.5338	83.7708	690.614	20.8777
32	Eda-11-32	66.2788	bd	0.114057	0.0043209	1.00859	0.047624	0.0641346	0.00180764	696.244	25.0019	708.162	24.0794	746.14	59.5951	98.317	93.3127	696.244	25.0019
29	Eda-11-29	87.002	0.0360298	0.115498	0.0040182	1.03462	0.0447693	0.0649687	0.00167167	704.578	23.2203	721.236	22.3459	773.396	54.1639	97.6904	91.1018	704.578	23.2203
74	Eda-11-74	107.291	0.951872	0.118565	0.00338061	1.04671	0.0406555	0.0640279	0.00168875	722.277	19.4822	727.253	20.172	742.621	55.7995	99.3157	97.2604	722.277	19.4822
67	Eda-11-67	130.272	0.165545	0.118956	0.00301772	1.0566	0.0358545	0.0644207	0.00145188	724.528	17.3849	732.148	17.7038	755.544	47.574	98.9592	95.8949	724.528	17.3849
70	Eda-11-70	143.211	1.0567	0.119267	0.00395376	1.03883	0.0413344	0.063172	0.0013901	726.32	22.771	723.337	20.5882	714.097	46.7634	100.412	101.712	726.32	22.771
1	Eda-11-01	112.893	0.345442	0.119406	0.00297858	1.04792	0.0414983	0.0636502	0.00195765	727.122	17.1525	727.852	20.5781	730.1	65.2075	99.8997	99.5922	727.122	17.1525
66	Eda-11-66	181.708	bd	0.119591	0.00287788	1.12378	0.0391582	0.0681521	0.0017175	728.188	16.5699	764.783	18.7237	873.256	52.2137	95.215	83.3877	728.188	16.5699
23	Eda-11-23	634.663	4.54349	0.119807	0.00582968	1.01441	0.0612029	0.0614083	0.00219055	729.432	33.559	711.098	30.8595	653.634	76.6039	102.578	111.596	729.432	33.559
58	Eda-11-58	278.452	bd	0.119961	0.00285621	1.07122	0.0314895	0.064765	0.00111655	730.313	16.4397	739.341	15.4384	766.788	36.3207	98.7789	95.2432	730.313	16.4397
21	Eda-11-21	257.018	bd	0.120008	0.00410454	1.05012	0.0434428	0.063464	0.001477	730.587	23.6238	728.943	21.5196	723.891	49.386	100.226	100.925	730.587	23.6238
80	Eda-11-80	141.346	bd	0.12278	0.00536713	1.08555	0.0568572	0.0641238	0.00185011	746.52	30.8145	746.337	27.6888	745.788	61.0113	100.024	100.098	746.52	30.8145
24	Eda-11-24	418.939	0.0577998	0.123131	0.00424772	1.0901	0.0434304	0.0642088	0.00127971	748.538	24.3799	748.55	21.1018	748.591	42.119	99.9983	99.9928	748.538	24.3799
14	Eda-11-14	73.8978	bd	0.12318	0.00454306	1.08929	0.0504131	0.0641362	0.00179312	748.817	26.0739	748.16	24.5052	746.198	59.1135	100.088	100.351	748.817	26.0739
26	Eda-11-26	41.0508	bd	0.123361	0.00473562	1.09414	0.059799	0.0643274	0.00250246	749.853	27.1747	750.514	29.0025	752.482	82.2067	99.9119	99.6505	749.853	27.1747
76	Eda-11-76	114.413	0.422872	0.12338	0.0035856	1.10788	0.0428998	0.0651251	0.00166655	749.964	20.575	757.156	20.668	778.451	53.8254	99.0502	96.3406	749.964	20.575
6	Eda-11-06	56.2405	bd	0.123541	0.00347277	1.10677	0.047651	0.0649744	0.00211889	750.89	19.9248	756.616	22.97	773.578	68.6646	99.2431	97.0671	750.89	19.9248
52	Eda-11-52	279.943	0.0846843	0.123722	0.00430985	1.13182	0.0480607	0.0663483	0.00161111	751.927	24.7235	768.622	22.8951	817.456	50.7545	97.828	91.9838	751.927	24.7235
36	Eda-11-36	149.347	bd	0.123808	0.00288851	1.10337	0.0362497	0.0646354	0.0014951	752.419	16.5686	754.977	17.501	762.563	48.7757	99.6612	98.6697	752.419	16.5686
68	Eda-11-68	44.1465	bd	0.123955	0.00384068	1.09151	0.0551312	0.0638649	0.00254751	753.263	22.0275	749.237	26.7712	737.233	84.5051	100.537	102.174	753.263	22.0275
13	Eda-11-13	768.153	0.53585	0.124253	0.00706678	1.18767	0.0749788	0.0693247	0.00189961	754.974	40.5198	794.881	34.8142	908.484	56.4623	94.9794	83.1025	754.974	40.5198
54	Eda-11-54	191.862	bd	0.124525	0.00345696	1.10318	0.0365888	0.0642523	0.00116604	756.533	19.8167	754.888	17.6663	750.022	38.3425	100.218	100.868	756.533	19.8167
28	Eda-11-28	103.279	bd	0.12511	0.00449134	1.10717	0.0513012	0.0641831	0.00188028	759.886	25.7328	756.812	24.7254	747.743	61.9316	100.406	101.624	759.886	25.7328
2	Eda-11-02	283.13	0.123083	0.125233	0.00312779	1.12811	0.0392454	0.0653331	0.00158215	760.588	17.9184	766.854	18.7272	785.155	50.8785	99.1829	96.8711	760.588	17.9184
25	Eda-11-25	70.3482	0.0405833	0.125851	0.00496739	1.12229	0.0544764	0.0646766	0.00182733	764.125	28.4417	764.07	26.0693	763.907	59.5713	100.007	100.029	764.125	28.4417
17	Eda-11-17	125.21	0.406214	0.126935	0.00429959	1.11756	0.0491106	0.0638542	0.00178765	770.332	24.5943	761.808	23.553	736.88	59.2852	101.119	104.54	770.332	24.5943
50	Eda-11-50	219.502	0.0606453	0.127285	0.00345476	1.15684	0.0508986	0.0659169	0.00228259	772.332	19.7556	780.469	23.9661	803.809	72.5651	98.9574	96.0839	772.332	19.7556
60	Eda-11-60	311.313	0.270387	0.128417	0.00407168	1.14945	0.0453185	0.0649182	0.00152123	778.806	23.26	776.985	21.4112	771.756	49.3383	100.234	100.913	778.806	23.26
48	Eda-11-48	330.972	0.21363	0.129187	0.00368631	1.16326	0.037463	0.0653065	0.000975112	783.202	21.0442	783.487	17.586	784.297	31.3711	99.9636	99.8604	783.202	21.0442
51	Eda-11-51	205.386	bd	0.129234	0.00373812	1.18551	0.0385501	0.0665318	0.000988453	783.466	21.3391	793.877	17.9121	823.226	31.0183	98.6886	95.1703	783.466	21.3391
46	Eda-11-46	62.6016	0.312417	0.130931	0.00449323	1.1667	0.0534418	0.064627	0.00196076	793.151	25.6112	785.099	25.0496	762.286	63.9915	101.026	104.049	793.151	25.6112
71	Eda-11-71	67.3096	0.0720369	0.13114	0.0039104	1.1353	0.0474382	0.0627877	0.00183789	794.339	22.2849	770.276	22.5616	701.118	62.3512	103.124	113.296	794.339	22.2849
19	Eda-11-19	47.3174	bd	0.131781	0.00474134	1.19233	0.0668934	0.0656212	0.0028248	797.991	27.0051	797.042	30.9914	794.387	90.3749	100.119	100.454	797.991	27.0051
40	Eda-11-40	165.832	bd	0.132129	0.00408481	1.2201	0.0450077	0.0669729	0.00134779	799.971	23.2585	809.823	20.5875	836.997	41.9283	98.7835	95.5764	799.971	23.2585
57	Eda-11-57	115.862	0.663043	0.132867	0.00372777	1.24929	0.0446786	0.0681938	0.00151236	804.176	21.2117	823.086	20.1716	874.524	45.9385	97.7026	91.9559	804.176	21.2117
49	Eda-11-49	322.212	0.114108	0.134272	0.00388182	1.2136	0.0388343	0.0655521	0.000899202	812.167	22.0609	806.843	17.8152	792.174	28.7819	100.66	102.524	812.167	22.0609
82	Eda-11-82	104.387	bd	0.134716	0.00575701	1.22887	0.0615974	0.0661581	0.00173321	814.69	32.7052	813.823	28.0685	811.448	54.8172	100.107	100.399	814.69	32.7052
81	Eda-11-81	41.7958	bd	0.135603	0.00646827	1.24181	0.0812903	0.066418	0.00297761	819.722	36.7173	819.702	36.8349	819.65	93.7462	100.002	100.009	819.722	36.7173
65	Eda-11-65	91.4772	0.595975	0.136948	0.00352684	1.32618	0.0434772	0.0702339	0.00142481	827.353	19.9964	857.215	18.9801	935.273	41.6231	96.5164	88.4611	827.353	19.9964
78	Eda-11-78	77.8511	0.171794	0.136998	0.00614624	1.24984	0.0659038	0.0661668	0.00183326	827.638	34.8465	823.334	29.7517	811.725	57.9691	100.523	101.96	827.638	34.8465
61	Eda-11-61	216.666	bd	0.138258	0.00395797	1.21189	0.0464549	0.0635725	0.00162062	834.78	22.4149	806.058	21.3286	727.515	54.059	103.563	114.744	834.78	22.4149
84	Eda-11-84	210.49	bd	0.138497	0.0062528	1.28161	0.0666893	0.0671139	0.00173645	836.132	35.4039	837.568	29.6872	841.384	53.8778	99.8284	99.3757	836.132	35.4039
62	Eda-11-62	118.91	bd	0.140002	0.00360885	1.28752	0.0440052	0.0666989	0.00149693	844.645	20.4065	840.197	19.5354	828.462	46.8254	100.529	101.953	844.645	20.4065
7	Eda-11-07	83.0861	0.605755	0.141538	0.00381512	1.31478	0.0598773	0.0673715	0.0024731	853.328	21.5438	852.224	26.2712	849.357	76.3702	100.13	100.468	853.328	21.5438
5	Eda-11-05	133.635	bd	0.142129	0.00445316	1.24286	0.056332	0.0634219	0.00207712	856.661	25.1339	820.178	25.5079	722.48	69.5276	104.448	118.572	856.661	25.1339
11	Eda-11-11	164.002	bd	0.149259	0.00494302	1.40161	0.0586537	0.0681058	0.00174233	896.779	27.7256	889.616	24.8033	871.844	53.0148	100.805	102.86	896.779	27.7256
35	Eda-11-35	317.433	0.194266	0.151246	0.00304505	1.41829	0.0406973	0.0680114	0.00139055	907.914	17.0503	896.646	17.0894	868.974	42.3861	101.257	104.481	907.914	17.0503
30	Eda-11-30	202.556	0.403949	0.160896	0.00381829	1.57368	0.0530745	0.0709365	0.00169995	961.724	21.2022	959.879	20.9422	955.653	49.0189	100.192	100.635	961.724	21.2022
83	Eda-11-83	732.539	0.0308519	0.380476	0.0175094	9.41563	0.482601	0.179482	0.00405052	2078.44	81.7653	2379.35	47.0808	2648.15	37.4508	87.3532	78.4866	-	-
41	Eda-11-41	287.059	0.11465	0.381056	0.0112342	8.30438	0.26757	0.158058	0.00205464	2081.15	52.4377	2264.8	29.2079	2435.06	22.0251	91.8911	85.466	-	-
Eda-12
				Isotope ratios						Ages (Ma)						Data filter A*	Data filter B#	quoted age	±2σ
#	Spot	U [ppm]	ƒ206%	206Pb/238U	±2σ	207Pb/235U	±2σ	207Pb/206Pb	±2σ	206Pb/238U	±2σ	207Pb/235U	±2σ	207Pb/206Pb	±2σ
1	Eda-12-01	192.476	bd	0.0870732	0.0040151	0.732039	0.0396131	0.0609745	0.00172673	538.187	23.8092	557.749	23.2267	638.404	60.9541	96.4927	84.302	538.187	23.8092
55	Eda-12-55	48.4451	2.91682	0.0896701	0.0033228	0.725956	0.0483396	0.0587166	0.00324845	553.568	19.6569	554.177	28.4457	556.674	120.878	99.8902	99.4421	553.568	19.6569
15	Eda-12-15	22.5659	0.779306	0.0917742	0.00437887	0.789812	0.064817	0.0624168	0.00416761	566.003	25.8545	591.065	36.7876	688.491	142.827	95.7599	82.2092	566.003	25.8545
2	Eda-12-02	62.1091	0.0125169	0.0927536	0.00432486	0.761364	0.0436563	0.0595333	0.00198677	571.783	25.5127	574.796	25.172	586.724	72.4649	99.4758	97.4535	571.783	25.5127
31	Eda-12-31	98.4418	bd	0.0928379	0.00291238	0.817507	0.0350734	0.0638653	0.00186913	572.281	17.179	606.657	19.5968	737.243	61.9745	94.3335	77.6245	572.281	17.179
32	Eda-12-32	76.9939	0.836476	0.0934715	0.00239623	0.793236	0.03491	0.0615492	0.00220174	576.017	14.1262	593.006	19.7695	658.555	76.7565	97.1351	87.4668	576.017	14.1262
26	Eda-12-26	278.517	0.0648221	0.0944375	0.00330124	0.804475	0.0306501	0.0617827	0.000936141	581.709	19.4443	599.35	17.2485	666.671	32.4488	97.0567	87.2558	581.709	19.4443
22	Eda-12-22	137.176	0.19001	0.0959462	0.00333518	0.806769	0.035361	0.0609846	0.00162816	590.589	19.6171	600.64	19.875	638.766	57.4541	98.3267	92.4578	590.589	19.6171
61	Eda-12-61	250.87	0.748266	0.0969685	0.00248883	0.862802	0.0324608	0.0645326	0.00177516	596.599	14.6253	631.651	17.6956	759.206	58.0406	94.4508	78.582	596.599	14.6253
44	Eda-12-44	302.535	0.270389	0.0991083	0.00256979	0.829995	0.0263474	0.0607385	0.00111231	609.161	15.0717	613.609	14.62	630.059	39.4583	99.2751	96.6832	609.161	15.0717
66	Eda-12-66	70.5768	0.961888	0.0991169	0.00362742	0.768957	0.0453061	0.0562669	0.00259809	609.212	21.2745	579.164	26.0114	462.995	102.463	105.188	131.581	609.212	21.2745
48	Eda-12-48	293.289	0.0026817	0.0993259	0.00254933	0.822124	0.0251041	0.0600307	0.000993084	610.438	14.9488	609.233	13.9902	604.758	35.7962	100.198	100.939	610.438	14.9488
28	Eda-12-28	49.6361	bd	0.0995381	0.00399643	0.822332	0.0435085	0.0599179	0.00206463	611.681	23.4298	609.349	24.2471	600.686	74.6441	100.383	101.83	611.681	23.4298
45	Eda-12-45	263.664	0.0718906	0.0995508	0.00277713	0.865307	0.0304604	0.0630412	0.00135348	611.756	16.2812	633.016	16.5826	709.691	45.6619	96.6415	86.2003	611.756	16.2812
42	Eda-12-42	322.502	bd	0.101178	0.00265051	0.836986	0.026027	0.0599973	0.00100522	621.287	15.5159	617.481	14.3872	603.547	36.2587	100.616	102.939	621.287	15.5159
23	Eda-12-23	148.788	0.644734	0.101533	0.00363544	0.847004	0.0349802	0.0605032	0.00124516	623.365	21.2748	623.004	19.2325	621.696	44.4078	100.058	100.269	623.365	21.2748
63	Eda-12-63	536.525	bd	0.10166	0.0025193	0.830314	0.0274112	0.0592367	0.00129203	624.11	14.7413	613.786	15.2077	575.881	47.4262	101.682	108.375	624.11	14.7413
62	Eda-12-62	165.625	0.661788	0.101904	0.00285354	0.892756	0.0375957	0.0635388	0.00199849	625.539	16.6934	647.849	20.1711	726.39	66.7334	96.5564	86.1162	625.539	16.6934
58	Eda-12-58	54.9264	bd	0.102868	0.00302864	0.847	0.0410636	0.0597175	0.00230017	631.174	17.7023	623.001	22.5783	593.429	83.5609	101.312	106.361	631.174	17.7023
65	Eda-12-65	65.5878	bd	0.104465	0.00310498	0.856981	0.0414462	0.0594976	0.00226993	640.501	18.1223	628.474	22.6662	585.427	82.8791	101.914	109.407	640.501	18.1223
36	Eda-12-36	319.219	1.40663	0.105269	0.00281544	0.866365	0.0387241	0.0596898	0.00213763	645.192	16.4204	633.592	21.0706	592.418	77.6958	101.831	108.908	645.192	16.4204
72	Eda-12-72	37.9405	bd	0.105652	0.00312093	0.866204	0.0420371	0.0594623	0.00228956	647.426	18.1958	633.504	22.8758	584.14	83.6658	102.198	110.834	647.426	18.1958
16	Eda-12-16	100.954	bd	0.106475	0.00322554	1.11847	0.060215	0.0761864	0.00339065	652.223	18.7917	762.244	28.8688	1100.04	89.1256	85.5661	59.2908	-	-
34	Eda-12-34	290.788	0.215821	0.10987	0.00281424	0.94587	0.0310786	0.0624382	0.00128493	671.972	16.3453	675.95	16.2186	689.225	43.9119	99.4116	97.4968	671.972	16.3453
30	Eda-12-30	307.256	bd	0.110437	0.00285122	0.93979	0.0323943	0.0617183	0.00140958	675.265	16.5517	672.772	16.9584	664.43	48.933	100.371	101.631	675.265	16.5517
18	Eda-12-18	279.829	0.246432	0.110645	0.00311178	0.923726	0.0293511	0.0605493	0.000895381	676.473	18.0609	664.328	15.4933	623.336	31.8956	101.828	108.525	676.473	18.0609
21	Eda-12-21	160.602	bd	0.110751	0.00372906	0.936714	0.0366553	0.061342	0.00122314	677.086	21.6415	671.161	19.22	651.326	42.8104	100.883	103.955	677.086	21.6415
47	Eda-12-47	120.66	bd	0.114915	0.00308817	0.984889	0.0376893	0.0621596	0.00169346	701.208	17.8552	696.109	19.2825	679.679	58.2361	100.732	103.167	701.208	17.8552
49	Eda-12-49	116.869	0.206967	0.120484	0.00339096	1.10287	0.0415581	0.0663887	0.00166344	733.323	19.5084	754.736	20.0692	818.725	52.3615	97.1628	89.5689	733.323	19.5084
43	Eda-12-43	229.092	bd	0.121099	0.00316726	1.07304	0.0351765	0.0642651	0.00127013	736.863	18.2115	740.232	17.2312	750.442	41.7519	99.5448	98.1906	736.863	18.2115
51	Eda-12-51	224.162	0.12575	0.121623	0.00304825	1.09056	0.0357531	0.0650329	0.00137439	739.876	17.519	748.777	17.3669	775.476	44.4651	98.8112	95.4093	739.876	17.519
56	Eda-12-56	108.285	1.53224	0.122107	0.003418	1.02496	0.0424966	0.0608784	0.00186206	742.658	19.6355	716.403	21.3124	635.009	65.8703	103.665	116.952	742.658	19.6355
29	Eda-12-29	171.909	0.858554	0.12299	0.00411981	1.15102	0.0436577	0.0678756	0.0012077	747.726	23.6487	777.726	20.6113	864.825	36.9024	96.1425	86.4597	747.726	23.6487
24	Eda-12-24	111.211	0.204249	0.12387	0.00415364	1.08751	0.0414617	0.0636742	0.00115521	752.777	23.8242	747.291	20.17	730.901	38.4474	100.734	102.993	752.777	23.8242
5	Eda-12-05	1744.43	1.40775	0.125952	0.00565978	1.119	0.0541315	0.0644352	0.00115424	764.709	32.4032	762.497	25.9444	756.021	37.8084	100.29	101.149	764.709	32.4032
6	Eda-12-06	181.131	0.135862	0.126693	0.00479851	1.14582	0.0481286	0.0655935	0.0011912	768.948	27.4541	775.265	22.7779	793.5	38.0993	99.1852	96.9058	768.948	27.4541
60	Eda-12-60	206.644	0.0332323	0.127011	0.00325622	1.12691	0.039623	0.06435	0.00154842	770.764	18.6248	766.28	18.9181	753.226	50.8165	100.585	102.328	770.764	18.6248
39	Eda-12-39	85.7211	0.706929	0.127618	0.00333512	1.2314	0.0443327	0.0699823	0.00173291	774.235	19.0658	814.977	20.1759	927.901	50.8642	95.0009	83.4394	774.235	19.0658
3	Eda-12-03	76.2347	1.84564	0.128129	0.00502955	1.08782	0.0562242	0.0615756	0.00207034	777.159	28.7394	747.445	27.3505	659.471	72.1264	103.975	117.846	777.159	28.7394
17	Eda-12-17	39.6466	1.04597	0.128827	0.00412174	1.02821	0.0688208	0.0578861	0.00340316	781.143	23.5375	718.032	34.467	525.527	129.166	108.79	148.64	781.143	23.5375
52	Eda-12-52	14.9407	bd	0.129168	0.00485671	1.16153	0.0805522	0.0652191	0.00380048	783.09	27.7262	782.672	37.8571	781.484	122.7	100.053	100.206	783.09	27.7262
27	Eda-12-27	178.488	bd	0.130007	0.0051404	1.17373	0.0504629	0.0654788	0.00110557	787.878	29.324	788.388	23.5763	789.828	35.4385	99.9354	99.7531	787.878	29.324
19	Eda-12-19	71.0916	bd	0.130569	0.00441944	1.19575	0.0536699	0.0664203	0.00195787	791.083	25.1986	798.623	24.8236	819.716	61.6026	99.0558	96.5069	791.083	25.1986
10	Eda-12-10	120.031	bd	0.131965	0.00498841	1.20015	0.0535291	0.065959	0.00156148	799.042	28.4077	800.655	24.7089	805.144	49.5815	99.7985	99.2421	799.042	28.4077
73	Eda-12-73	255.355	bd	0.132185	0.00324972	1.23932	0.0394041	0.0679986	0.001371	800.294	18.5026	818.574	17.869	868.583	41.7948	97.7668	92.1379	800.294	18.5026
38	Eda-12-38	56.4352	bd	0.132506	0.0030395	1.16369	0.0401115	0.0636943	0.00163875	802.12	17.3008	783.687	18.8258	731.568	54.5311	102.352	109.644	802.12	17.3008
64	Eda-12-64	50.2871	2.80621	0.132539	0.00423026	1.07531	0.133967	0.0588424	0.00708617	802.306	24.078	741.342	65.6368	561.337	264.726	108.223	142.928	802.306	24.078
11	Eda-12-11	366.55	0.487575	0.133036	0.00396813	1.20388	0.0413759	0.0656317	0.00112061	805.133	22.576	802.375	19.0652	794.721	35.8152	100.344	101.31	805.133	22.576
70	Eda-12-70	85.9999	0.723402	0.134063	0.00370529	1.20866	0.0477522	0.0653874	0.00184601	810.974	21.0616	804.574	21.9565	786.901	59.3042	100.796	103.059	810.974	21.0616
13	Eda-12-13	203.712	0.314762	0.134447	0.00420031	1.23327	0.0443644	0.0665282	0.00118643	813.161	23.8673	815.828	20.1734	823.112	37.2362	99.6731	98.7911	813.161	23.8673
41	Eda-12-41	312.733	0.297524	0.134538	0.00403286	1.24713	0.0417861	0.0672307	0.00100642	813.673	22.914	822.11	18.8835	844.998	31.147	98.9738	96.2929	813.673	22.914
9	Eda-12-09	69.728	0.704391	0.134706	0.00551108	1.22228	0.0570418	0.0658087	0.00147763	814.628	31.3084	810.816	26.0688	800.366	47.0543	100.47	101.782	814.628	31.3084
54	Eda-12-54	102.23	0.0754354	0.134756	0.00418128	1.23072	0.0501793	0.0662388	0.00175201	814.912	23.7527	814.668	22.8445	814.004	55.3179	100.03	100.112	814.912	23.7527
68	Eda-12-68	90.4592	1.05884	0.135775	0.00350426	1.15092	0.056545	0.0614786	0.00257011	820.701	19.8888	777.678	26.6993	656.095	89.7598	105.532	125.089	820.701	19.8888
57	Eda-12-57	378.912	0.103047	0.13583	0.0037512	1.19648	0.039764	0.0638865	0.00118114	821.013	21.2894	798.961	18.384	737.948	39.1388	102.76	111.256	821.013	21.2894
53	Eda-12-53	216.786	bd	0.136168	0.00362793	1.21627	0.0400269	0.064782	0.00125145	822.93	20.5836	808.069	18.3403	767.341	40.6981	101.839	107.244	822.93	20.5836
7	Eda-12-07	47.5776	bd	0.136709	0.00597657	1.24209	0.0692588	0.0658952	0.00228073	825.999	33.8931	819.828	31.3755	803.123	72.5365	100.753	102.848	825.999	33.8931
20	Eda-12-20	39.7354	0.530476	0.14119	0.0049608	1.50669	0.0987395	0.0773961	0.00428148	851.359	28.0221	933.099	40.017	1131.48	110.331	91.2399	75.2428	851.359	28.0221
37	Eda-12-37	299.072	0.0884381	0.141217	0.00276796	1.29873	0.0297029	0.0667008	0.000786044	851.515	15.635	845.163	13.1209	828.519	24.581	100.752	102.776	851.515	15.635
71	Eda-12-71	366.829	0.123199	0.141471	0.00390267	1.24805	0.0431196	0.0639826	0.00133088	852.949	22.0396	822.524	19.4783	741.124	44.0121	103.699	115.089	852.949	22.0396
69	Eda-12-69	98.1609	0.104811	0.146032	0.00363092	1.2993	0.0468914	0.0645298	0.00168798	878.654	20.4233	845.413	20.7103	759.12	55.1891	103.932	115.746	878.654	20.4233
35	Eda-12-35	442.524	0.489058	0.146572	0.00294851	1.36961	0.0368627	0.0677711	0.00121182	881.692	16.577	875.998	15.797	861.63	37.1075	100.65	102.328	881.692	16.577
4	Eda-12-04	22.3438	1.28819	0.14795	0.00648089	1.35203	0.0971959	0.0662782	0.00377794	889.434	36.3932	868.437	41.9838	815.244	119.362	102.418	109.1	889.434	36.3932
59	Eda-12-59	104.074	bd	0.149951	0.00419303	1.41445	0.0520811	0.0684126	0.00163885	900.66	23.5047	895.03	21.9058	881.152	49.5672	100.629	102.214	900.66	23.5047
8	Eda-12-08	46.1209	bd	0.152018	0.00619062	1.47652	0.0726298	0.0704439	0.00194365	912.234	34.6404	920.804	29.7871	941.396	56.5624	99.0693	96.9023	912.234	34.6404
40	Eda-12-40	221.619	bd	0.185737	0.00455731	1.64059	0.0577755	0.0640619	0.00161832	1098.21	24.7757	985.939	22.2199	743.747	53.4344	111.387	147.659	-	-
67	Eda-12-67	626.743	0.744659	0.268475	0.00818155	5.04284	0.198078	0.136229	0.00337608	1533.01	41.578	1826.55	33.2951	2179.88	43.1538	83.9292	70.3254	-	-
33	Eda-12-33	1750.51	0.800477	0.272667	0.00875365	6.0861	0.204839	0.161884	0.001636	1554.28	44.3389	1988.26	29.36	2475.5	17.0517	78.1728	62.7863	-	-
14	Eda-12-14	331.917	0.0735447	0.321548	0.00873903	4.94694	0.142861	0.111581	0.00108949	1797.23	42.6276	1810.3	24.3969	1825.39	17.7097	99.2778	98.4575	1825.39	17.7097
46	Eda-12-46	66.2454	0.193496	0.43587	0.0111788	9.83389	0.287938	0.163631	0.00231152	2332.05	50.1873	2419.33	26.9927	2493.6	23.7942	96.3924	93.5217	2493.6	23.7942
50	Eda-12-50	204.562	0.0121054	0.457632	0.0118479	11.0479	0.328939	0.17509	0.00257457	2429.02	52.3972	2527.18	27.7295	2606.97	24.4999	96.1158	93.174	2606.97	24.4999
12	Eda-12-12	575.719	bd	0.476575	0.016	10.6858	0.394219	0.16262	0.00248687	2512.25	69.8532	2496.19	34.2667	2483.15	25.7874	100.643	101.172	2483.15	25.7874
25	Eda-12-25	103.501	bd	0.484722	0.0177739	10.7403	0.420302	0.160703	0.00219661	2547.72	77.1726	2500.92	36.3661	2463.14	23.0932	101.871	103.434	2463.14	23.0932
Hu-1
				Isotope ratios						Ages (Ma)						Data filter A*	Data filter B#	quoted age	±2σ
#	Spot	U [ppm]	ƒ206%	206Pb/238U	±2σ	207Pb/235U	±2σ	207Pb/206Pb	±2σ	206Pb/238U	±2σ	207Pb/235U	±2σ	207Pb/206Pb	±2σ
47	Hu-1-47	3332.58	5.72996	0.0192143	0.000644888	0.160974	0.0158736	0.0607616	0.00563396	122.685	4.07871	151.555	13.8839	630.879	200.734	80.9504	19.4466	-	-
16	Hu-1-16	3046.3	6.43873	0.0203325	0.0013725	0.171061	0.0171798	0.0610182	0.00453745	129.753	8.6711	160.34	14.8971	639.949	160.446	80.9238	20.2755	-	-
3	Hu-1-3	426.863	0.346823	0.0442426	0.00191824	0.393601	0.0197609	0.064523	0.00163324	279.068	11.8415	336.997	14.3988	758.891	53.4105	82.8103	36.7731	-	-
23	Hu-1-23	895.551	0.200834	0.0662846	0.000952019	0.489436	0.0119671	0.0535527	0.00105969	413.719	5.75542	404.526	8.15841	352.359	44.7226	102.273	117.414	413.719	5.75542
38	Hu-1-38	52.5559	3.76958	0.0832942	0.00334992	0.328622	0.0514942	0.0286142	0.00433356	515.739	19.934	288.514	39.3736	-	-	178.757	-	-	-
34	Hu-1-34	34.4908	bd	0.084987	0.00302867	0.678951	0.0438644	0.0579408	0.00312234	525.804	17.9942	526.14	26.534	527.596	118.318	99.9362	99.6603	525.804	17.9942
15	Hu-1-15	726.854	0.0717367	0.0886493	0.00161281	0.727958	0.0176844	0.0595566	0.000958776	547.526	9.54993	555.354	10.3921	587.573	34.9331	98.5904	93.1844	547.526	9.54993
44	Hu-1-44	34.6158	0.237399	0.0919696	0.00328862	0.735378	0.0524871	0.0579916	0.00358221	567.157	19.4137	559.705	30.72	529.513	135.655	101.331	107.109	567.157	19.4137
14	Hu-1-14	372.275	bd	0.0930746	0.00147812	0.782328	0.0179588	0.0609616	0.00101048	573.677	8.71693	586.81	10.2314	637.956	35.6674	97.7618	89.9242	573.677	8.71693
45	Hu-1-45	58.6667	0.738545	0.0941296	0.0025743	0.807199	0.0439998	0.0621947	0.00293261	579.896	15.1668	600.882	24.7264	680.881	100.856	96.5075	85.1685	579.896	15.1668
28	Hu-1-28	116.145	bd	0.096536	0.00274089	0.789661	0.0375739	0.0593267	0.00226527	594.057	16.1129	590.98	21.3211	579.181	83.0317	100.521	102.569	594.057	16.1129
7	Hu-1-7	105.874	bd	0.0972763	0.00248575	0.806554	0.0333178	0.0601347	0.00195178	598.408	14.6032	600.519	18.7286	608.497	70.2143	99.6485	98.342	598.408	14.6032
10	Hu-1-10	74.3613	0.974975	0.0975063	0.00287627	0.853326	0.0443366	0.0634718	0.0027148	599.759	16.8938	626.473	24.2953	724.149	90.8184	95.7358	82.8226	599.759	16.8938
37	Hu-1-37	263.349	bd	0.0975302	0.00174461	0.803601	0.0251981	0.0597586	0.001539	599.899	10.2468	598.858	14.1868	594.916	55.8281	100.174	100.838	599.899	10.2468
9	Hu-1-9	165.192	0.31636	0.0979055	0.00210257	0.823925	0.0253161	0.0610351	0.00134125	602.103	12.345	610.236	14.0944	640.54	47.2689	98.6673	93.9993	602.103	12.345
19	Hu-1-19	85.3711	bd	0.0986097	0.00222933	0.812633	0.0341424	0.0597687	0.00211662	606.236	13.0808	603.93	19.1278	595.279	76.7899	100.382	101.841	606.236	13.0808
33	Hu-1-33	739.026	1.1569	0.101001	0.00536212	0.861284	0.0516423	0.0618469	0.00172358	620.254	31.3947	630.823	28.1796	668.893	59.6809	98.3245	92.7285	620.254	31.3947
39	Hu-1-39	271.593	0.054682	0.101275	0.00153138	0.852984	0.0265983	0.0610857	0.00166587	621.854	8.9638	626.286	14.5761	642.323	58.6557	99.2923	96.8132	621.854	8.9638
20	Hu-1-20	119.262	bd	0.101768	0.00241623	0.853764	0.0300278	0.060845	0.00157881	624.742	14.1368	626.713	16.4489	633.836	55.8853	99.6856	98.5654	624.742	14.1368
8	Hu-1-8	130.604	bd	0.101959	0.00238506	0.869923	0.0303188	0.0618805	0.00159872	625.859	13.9521	635.526	16.4648	670.056	55.3083	98.479	93.404	625.859	13.9521
25	Hu-1-25	96.4775	bd	0.102276	0.00251189	0.858729	0.0374093	0.0608949	0.00219103	627.714	14.6898	629.429	20.4387	635.591	77.4956	99.7275	98.7607	627.714	14.6898
27	Hu-1-27	38.0754	bd	0.102919	0.00334914	0.845531	0.0547665	0.0595843	0.00333695	631.473	19.5747	622.193	30.1406	588.584	121.708	101.492	107.287	631.473	19.5747
12	Hu-1-12	13.6185	bd	0.103106	0.00408272	0.982718	0.0681444	0.0691262	0.00393503	632.567	23.8582	694.998	34.9117	902.581	117.569	91.017	70.0842	632.567	23.8582
1	Hu-1-1	303.453	0.246592	0.103537	0.00260874	0.878574	0.0285498	0.0615437	0.00126294	635.08	15.2387	640.212	15.4326	658.364	44.0121	99.1984	96.4634	635.08	15.2387
42	Hu-1-42	164.118	bd	0.105328	0.00230121	0.897758	0.0335521	0.0618179	0.00187444	645.537	13.4205	650.529	17.9537	667.882	64.95	99.2327	96.6544	645.537	13.4205
5	Hu-1-5	291.249	0.164117	0.10729	0.00220373	0.926459	0.0248662	0.0626279	0.00108203	656.966	12.8293	665.77	13.107	695.691	36.8214	98.6777	94.4336	656.966	12.8293
31	Hu-1-31	200.196	0.424576	0.109071	0.00300192	0.923167	0.0358731	0.0613862	0.00168394	667.328	17.448	664.034	18.9423	652.862	58.8942	100.496	102.216	667.328	17.448
32	Hu-1-32	309.932	0.0388369	0.110278	0.00170632	0.924989	0.0269973	0.060834	0.0015055	674.34	9.90679	664.995	14.2413	633.445	53.3009	101.405	106.456	674.34	9.90679
43	Hu-1-43	160.414	bd	0.111268	0.00271486	0.959032	0.0351615	0.062512	0.00171069	680.084	15.7483	682.795	18.2265	691.743	58.3792	99.6029	98.3145	680.084	15.7483
11	Hu-1-11	129.567	bd	0.117547	0.00272686	1.08386	0.0366753	0.0668743	0.00164739	716.409	15.729	745.517	17.8723	833.936	51.3554	96.0955	85.9069	716.409	15.729
41	Hu-1-41	123.211	bd	0.11877	0.00262321	1.0344	0.0369031	0.0631656	0.0017697	723.46	15.1146	721.128	18.4206	713.878	59.5522	100.323	101.342	723.46	15.1146
6	Hu-1-6	131.534	bd	0.118832	0.00285804	1.06546	0.0370742	0.0650285	0.00163522	723.812	16.4668	736.511	18.2277	775.332	52.9146	98.2758	93.3551	723.812	16.4668
2	Hu-1-2	66.8683	bd	0.120256	0.00364248	1.03501	0.0475478	0.0624216	0.00215603	732.014	20.9597	721.429	23.7287	688.663	73.7381	101.467	106.295	732.014	20.9597
18	Hu-1-18	78.69	0.515557	0.122815	0.00218432	1.07696	0.0357779	0.0635982	0.00178453	746.723	12.5405	742.147	17.4928	728.364	59.5045	100.616	102.521	746.723	12.5405
30	Hu-1-30	135.929	0.387292	0.123989	0.00218832	1.1013	0.0407344	0.0644199	0.00209398	753.457	12.5503	753.977	19.686	755.515	68.6407	99.931	99.7276	753.457	12.5503
24	Hu-1-24	205.531	0.330371	0.124058	0.00321175	1.09749	0.0407429	0.0641612	0.00170714	753.855	18.4186	752.135	19.7259	747.018	56.2477	100.229	100.915	753.855	18.4186
21	Hu-1-21	227.856	0.967431	0.126593	0.00331813	1.19839	0.0375402	0.0686572	0.00117778	768.377	18.9859	799.843	17.3406	888.534	35.4528	96.0659	86.477	768.377	18.9859
46	Hu-1-46	96.1163	bd	0.128907	0.00294945	1.17398	0.0468676	0.0660513	0.00216085	781.604	16.8418	788.505	21.8935	808.072	68.4977	99.1248	96.7246	781.604	16.8418
22	Hu-1-22	145.035	0.0174342	0.129369	0.00174094	1.16167	0.0281019	0.0651254	0.00130918	784.239	9.93691	782.738	13.2008	778.461	42.2764	100.192	100.742	784.239	9.93691
29	Hu-1-29	175.919	bd	0.131071	0.00243948	1.1922	0.042572	0.0659688	0.0020104	793.949	13.9031	796.978	19.721	805.459	63.8342	99.6199	98.571	793.949	13.9031
4	Hu-1-4	173.998	bd	0.134583	0.00342344	1.21744	0.04219	0.0656079	0.00154406	813.934	19.4505	808.606	19.3214	793.967	49.3765	100.659	102.515	813.934	19.4505
36	Hu-1-36	246.499	0.425147	0.138642	0.00198027	1.23793	0.0356156	0.0647591	0.00161731	836.952	11.2109	817.944	16.1607	766.587	52.6285	102.324	109.179	836.952	11.2109
17	Hu-1-17	389.737	bd	0.140758	0.00189533	1.27768	0.0276654	0.0658337	0.00111633	848.922	10.7101	835.822	12.3337	801.167	35.5291	101.567	105.961	848.922	10.7101
26	Hu-1-26	58.0142	bd	0.141464	0.00262205	1.14085	0.058413	0.0584902	0.00279165	852.907	14.8076	772.914	27.7115	548.244	104.384	110.35	155.571	-	-
13	Hu-1-13	38.5878	1.37715	0.143063	0.00470533	1.26839	0.0751153	0.064302	0.00316675	861.933	26.5354	831.671	33.6356	751.653	104.141	103.639	114.672	861.933	26.5354
40	Hu-1-40	108.75	bd	0.153194	0.00324202	1.41575	0.0544709	0.0670259	0.00215367	918.814	18.1225	895.577	22.899	838.647	66.9527	102.595	109.559	918.814	18.1225
35	Hu-1-35	882.119	0.522826	0.431991	0.00880403	10.008	0.313871	0.168025	0.00400525	2314.61	39.6325	2435.53	28.9593	2538.13	39.9828	95.0354	91.1935	2538.13	39.9828
Hu-2
				Isotope ratios						Ages (Ma)						Data filter A*	Data filter B#	quoted age	±2σ
#	Spot	U [ppm]	ƒ206%	206Pb/238U	±2σ	207Pb/235U	±2σ	207Pb/206Pb	±2σ	206Pb/238U	±2σ	207Pb/235U	±2σ	207Pb/206Pb	±2σ
48	Hu-2-48	272.288	0.532077	0.0312351	0.00230506	0.313451	0.0244052	0.0727821	0.00180662	198.268	14.4089	276.852	18.869	1007.96	50.3635	71.615	19.6701	-	-
32	Hu-2-32	259.235	1.03609	0.0374979	0.00200039	0.368401	0.0228326	0.0712546	0.00224799	237.297	12.4289	318.467	16.9438	964.799	64.4541	74.5122	24.5955	-	-
54	Hu-2-54	2266.19	5.58667	0.0437764	0.00144362	0.368728	0.0204605	0.0610893	0.00272624	276.189	8.9156	318.71	15.1796	642.457	96.0493	86.6584	42.9895	-	-
57	Hu-2-57	88.101	bd	0.0869724	0.00281523	0.764838	0.0375766	0.0637803	0.00235728	537.589	16.6956	576.797	21.6226	734.429	78.3253	93.2024	73.1982	537.589	16.6956
40	Hu-2-40	93.7684	bd	0.0888134	0.00167999	0.752495	0.0239958	0.0614503	0.00157755	548.498	9.94621	569.671	13.9039	655.103	55.0938	96.2832	83.727	548.498	9.94621
55	Hu-2-55	50.979	0.811604	0.0889893	0.00353349	0.71384	0.0441321	0.0581784	0.00275688	549.539	20.9164	547.024	26.1523	536.561	103.841	100.46	102.419	549.539	20.9164
43	Hu-2-43	402.253	0.00206729	0.0894372	0.00158869	0.765982	0.0228836	0.0621154	0.00149203	552.19	9.40028	577.455	13.1581	678.153	51.3554	95.6247	81.4256	552.19	9.40028
14	Hu-2-14	404.736	0.424439	0.0930488	0.00294968	0.80097	0.0486879	0.0624316	0.00323805	573.524	17.3956	597.376	27.4568	688.996	110.817	96.0073	83.2406	573.524	17.3956
42	Hu-2-42	419.776	0.446753	0.0942946	0.00140019	0.775992	0.0189089	0.0596856	0.00115314	580.867	8.24814	583.195	10.8111	592.265	41.8901	99.6009	98.0755	580.867	8.24814
41	Hu-2-41	634.876	0.0439027	0.0952401	0.00139105	0.778064	0.0151939	0.0592508	0.000767994	586.435	8.18728	584.378	8.67685	576.396	28.1763	100.352	101.742	586.435	8.18728
44	Hu-2-44	75.3774	bd	0.0969855	0.00207424	0.774957	0.0293636	0.0579521	0.0018126	596.699	12.1889	582.602	16.7993	528.026	68.5835	102.42	113.006	596.699	12.1889
33	Hu-2-33	55.2609	bd	0.100319	0.00195916	0.822497	0.0276464	0.0594636	0.00162677	616.257	11.4777	609.441	15.4041	584.188	59.4139	101.118	105.49	616.257	11.4777
13	Hu-2-13	1010.46	1.36688	0.10215	0.00365474	0.923878	0.0461503	0.0655955	0.00228665	626.977	21.3758	664.408	24.3618	793.567	73.1659	94.3663	79.0075	626.977	21.3758
68	Hu-2-68	176.427	0.362514	0.102528	0.00475706	0.902858	0.0527376	0.063867	0.00226632	629.186	27.8135	653.254	28.1485	737.3	75.1591	96.3157	85.3365	629.186	27.8135
2	Hu-2-02	212.782	0.151416	0.103227	0.00158472	0.860531	0.027439	0.0604606	0.00168971	633.272	9.25961	630.412	14.9759	620.17	60.3294	100.454	102.113	633.272	9.25961
56	Hu-2-56	45.9941	7.61413	0.103325	0.00428382	0.668822	0.0806988	0.0469465	0.00531957	633.846	25.0285	519.996	49.1389	46.5822	148.568	121.894	1360.7	-	-
61	Hu-2-61	163.197	bd	0.103605	0.00336354	0.859841	0.0380202	0.0601917	0.00180698	635.48	19.6466	630.036	20.7601	610.547	64.9166	100.864	104.084	635.48	19.6466
26	Hu-2-26	288.277	0.182198	0.104353	0.00216196	0.916534	0.0312249	0.0637003	0.00172278	639.85	12.6195	660.525	16.5445	731.769	57.3206	96.8698	87.4388	639.85	12.6195
28	Hu-2-28	87.0359	bd	0.104829	0.00202709	0.879518	0.0312404	0.0608503	0.00181303	642.625	11.8272	640.722	16.8787	634.017	64.1775	100.297	101.358	642.625	11.8272
19	Hu-2-19	486.311	bd	0.106258	0.00142349	0.87285	0.0240716	0.0595768	0.00143614	650.958	8.29475	637.114	13.0514	588.317	52.3138	102.173	110.647	650.958	8.29475
5	Hu-2-05	186.88	bd	0.106382	0.00231131	0.902597	0.0329259	0.0615351	0.00180318	651.683	13.4666	653.114	17.5737	658.059	62.8614	99.7809	99.0311	651.683	13.4666
37	Hu-2-37	74.6537	bd	0.10643	0.00204423	0.95097	0.0307527	0.0648038	0.00168595	651.962	11.91	678.608	16.0066	768.046	54.8124	96.0735	84.8858	651.962	11.91
66	Hu-2-66	41.6152	0.332143	0.106719	0.0045274	0.86464	0.0559833	0.0587614	0.0028742	653.644	26.3705	632.653	30.4947	558.343	106.797	103.318	117.069	653.644	26.3705
62	Hu-2-62	155.933	bd	0.108078	0.00405455	0.890655	0.0413306	0.0597686	0.00163246	661.552	23.5873	646.721	22.2003	595.279	59.2089	102.293	111.133	661.552	23.5873
22	Hu-2-22	71.9487	bd	0.108323	0.00221519	0.913837	0.0337139	0.061185	0.00187877	662.983	12.884	659.095	17.8887	645.814	66.0133	100.59	102.658	662.983	12.884
15	Hu-2-15	82.4296	bd	0.108355	0.00265947	0.90273	0.0410969	0.0604238	0.00231679	663.165	15.4675	653.186	21.9346	618.863	82.8266	101.528	107.159	663.165	15.4675
21	Hu-2-21	214.347	0.464708	0.108493	0.00238402	0.901613	0.0367423	0.0602723	0.00206854	663.967	13.8638	652.589	19.6213	613.437	74.1911	101.744	108.237	663.967	13.8638
63	Hu-2-63	34.9756	bd	0.108495	0.00436884	0.942332	0.0510904	0.0629929	0.00228692	663.983	25.4061	674.102	26.7145	708.06	77.2667	98.4988	93.7749	663.983	25.4061
6	Hu-2-06	216.452	0.151502	0.108764	0.00259611	0.967692	0.038807	0.0645284	0.00207946	665.544	15.0935	687.273	20.0281	759.072	68.0113	96.8383	87.6785	665.544	15.0935
25	Hu-2-25	263.644	0.205664	0.109016	0.00231343	0.942989	0.0404886	0.062736	0.00234166	667.007	13.447	674.445	21.1619	699.363	79.5555	98.8971	95.3736	667.007	13.447
1	Hu-2-01	89.4324	0.323921	0.109892	0.00226889	0.958647	0.0383423	0.0632689	0.00216729	672.1	13.1777	682.595	19.8796	717.359	72.7892	98.4625	93.691	672.1	13.1777
11	Hu-2-11	128.749	bd	0.110296	0.00251521	0.94985	0.0363432	0.0624587	0.00191897	674.446	14.603	678.024	18.9279	689.921	65.5699	99.4723	97.757	674.446	14.603
60	Hu-2-60	121.946	0.414647	0.110353	0.00360935	0.914756	0.0440817	0.0601202	0.00212767	674.775	20.9543	659.583	23.3804	607.972	76.5753	102.303	110.988	674.775	20.9543
53	Hu-2-53	160.203	0.367657	0.1108	0.00369609	0.952408	0.0391798	0.0623424	0.00150078	677.368	21.4493	679.356	20.3788	685.945	51.3983	99.7074	98.7497	677.368	21.4493
72	Hu-2-72	113.259	bd	0.110977	0.00255061	0.958635	0.0347627	0.0626496	0.00175727	678.399	14.7994	682.589	18.0234	696.435	59.7954	99.3861	97.4102	678.399	14.7994
52	Hu-2-52	103.323	bd	0.11218	0.00228201	0.941414	0.0349808	0.0608647	0.00189257	685.371	13.2266	673.622	18.2974	634.532	66.9718	101.744	108.012	685.371	13.2266
34	Hu-2-34	104.08	bd	0.113817	0.00202551	0.999221	0.0312512	0.0636728	0.00163758	694.854	11.7226	703.414	15.8734	730.853	54.512	98.783	95.0743	694.854	11.7226
75	Hu-2-75	111.847	bd	0.114269	0.00223639	0.961824	0.0267169	0.0610471	0.00120334	697.472	12.9379	684.241	13.8288	640.969	42.3956	101.934	108.815	697.472	12.9379
76	Hu-2-76	185.073	1.25372	0.114495	0.00293869	0.90703	0.0429269	0.057456	0.0022846	698.775	16.9973	655.477	22.86	509.152	87.5092	106.606	137.243	698.775	16.9973
23	Hu-2-23	118.505	1.74305	0.115074	0.00177312	0.964142	0.0397886	0.0607661	0.00232637	702.127	10.2503	685.44	20.5719	631.042	82.531	102.435	111.265	702.127	10.2503
46	Hu-2-46	72.4447	0.293668	0.115762	0.00288463	1.01895	0.0603577	0.0638391	0.00343063	706.101	16.6657	713.386	30.3645	736.375	113.95	98.9788	95.8889	706.101	16.6657
47	Hu-2-47	223.592	bd	0.115943	0.00202985	1.03534	0.027933	0.0647646	0.00132948	707.146	11.7254	721.594	13.936	766.768	43.2539	97.9977	92.2242	707.146	11.7254
38	Hu-2-38	69.105	6.18815	0.116579	0.00570654	1.59292	0.209517	0.0990994	0.0120983	710.822	32.9451	967.442	82.2256	1607.31	229.278	73.4744	44.2244	-	-
65	Hu-2-65	156.211	bd	0.116718	0.0042804	1.00293	0.0438794	0.0623203	0.00148693	711.626	24.7086	705.296	22.2482	685.191	50.9501	100.897	103.858	711.626	24.7086
58	Hu-2-58	76.9824	0.827346	0.117009	0.00399911	1.06666	0.0470952	0.066116	0.00184803	713.3	23.0788	737.1	23.1427	810.122	58.4936	96.7711	88.0484	713.3	23.0788
30	Hu-2-30	116.336	bd	0.121519	0.00195872	1.05269	0.0290507	0.0628286	0.00140736	739.275	11.2582	730.216	14.3712	702.51	47.6933	101.241	105.233	739.275	11.2582
70	Hu-2-70	149.907	bd	0.123445	0.00447116	1.07978	0.0458685	0.0634395	0.00140806	750.339	25.6552	743.527	22.3974	723.071	47.102	100.916	103.771	750.339	25.6552
74	Hu-2-74	81.7603	0.186236	0.123701	0.0027632	1.03755	0.0401431	0.0608324	0.00192173	751.804	15.8514	722.696	20.0073	633.388	68.0542	104.028	118.696	751.804	15.8514
69	Hu-2-69	342.569	0.270399	0.123773	0.00447738	1.10326	0.0449487	0.0646471	0.00121174	752.222	25.6833	754.926	21.703	762.944	39.5203	99.6419	98.5946	752.222	25.6833
17	Hu-2-17	176.641	0.754865	0.124577	0.00200686	1.08816	0.0368392	0.0633513	0.00188635	756.827	11.5036	747.61	17.9152	720.115	63.2334	101.233	105.098	756.827	11.5036
45	Hu-2-45	71.9562	0.159862	0.125337	0.00281702	1.12993	0.0462096	0.0653838	0.00223392	761.186	16.1366	767.72	22.0325	786.777	71.7878	99.1489	96.7474	761.186	16.1366
18	Hu-2-18	97.6316	0.560331	0.125502	0.00216945	1.08676	0.039187	0.0628029	0.00198741	762.131	12.4253	746.926	19.07	701.632	67.4105	102.036	108.622	762.131	12.4253
36	Hu-2-36	104.247	0.777838	0.125552	0.00309122	1.18406	0.0460468	0.0683987	0.00205896	762.418	17.7039	793.203	21.4106	880.733	62.3035	96.1189	86.5663	762.418	17.7039
50	Hu-2-50	345.636	0.105938	0.126862	0.00178883	1.10168	0.0284278	0.0629827	0.00136111	769.915	10.233	754.161	13.7352	707.717	45.9766	102.089	108.788	769.915	10.233
3	Hu-2-03	83.0352	bd	0.126879	0.00208345	1.16746	0.038568	0.0667345	0.001913	770.01	11.9182	785.454	18.0698	829.568	59.8097	98.0337	92.8206	770.01	11.9182
20	Hu-2-20	128.148	0.214983	0.128005	0.00219033	1.14765	0.0414582	0.0650249	0.00206876	776.45	12.5171	776.131	19.6034	775.218	66.967	100.041	100.159	776.45	12.5171
12	Hu-2-12	280.413	0.21148	0.129197	0.00269109	1.17857	0.0397301	0.0661611	0.00175362	783.257	15.3626	790.647	18.5194	811.543	55.4562	99.0652	96.5144	783.257	15.3626
4	Hu-2-04	55.5169	0.604569	0.129358	0.00254282	1.16573	0.0477754	0.0653586	0.00235038	784.178	14.514	784.645	22.4027	785.975	75.5787	99.9405	99.7714	784.178	14.514
71	Hu-2-71	201.894	0.16054	0.129668	0.00494349	1.18581	0.0557318	0.0663257	0.00182298	785.945	28.2091	794.016	25.8949	816.741	57.4589	98.9835	96.2293	785.945	28.2091
24	Hu-2-24	252.532	bd	0.130516	0.00173532	1.17865	0.022895	0.0654969	0.000927518	790.783	9.89479	790.685	10.6708	790.41	29.7213	100.012	100.047	790.783	9.89479
73	Hu-2-73	173.956	0.575299	0.131281	0.0031084	1.18884	0.0372627	0.0656784	0.00134889	795.141	17.7122	795.424	17.2875	796.218	43.0679	99.9645	99.8648	795.141	17.7122
77	Hu-2-77	153.516	0.123423	0.131463	0.00235452	1.17915	0.0310197	0.0650526	0.00125346	796.182	13.4142	790.919	14.4547	776.114	40.5359	100.665	102.586	796.182	13.4142
59	Hu-2-59	287.466	bd	0.131629	0.00417598	1.23673	0.0490601	0.0681433	0.00162281	797.125	23.7881	817.399	22.2748	872.989	49.3431	97.5197	91.3099	797.125	23.7881
27	Hu-2-27	294.071	bd	0.131745	0.00184903	1.14645	0.0366487	0.0631131	0.0018127	797.785	10.5318	775.564	17.3384	712.113	61.0685	102.865	112.031	797.785	10.5318
35	Hu-2-35	201.397	0.336619	0.134921	0.00272143	1.24482	0.041108	0.0669158	0.00174966	815.85	15.4574	821.066	18.5961	835.223	54.4977	99.3646	97.6804	815.85	15.4574
49	Hu-2-49	76.2405	bd	0.136194	0.00261656	1.23616	0.0406544	0.0658289	0.00175714	823.079	14.8451	817.142	18.4621	801.015	55.9425	100.727	102.754	823.079	14.8451
7	Hu-2-07	199.919	bd	0.138253	0.00259062	1.26153	0.0447139	0.0661788	0.00199107	834.751	14.6714	828.593	20.0783	812.106	62.952	100.743	102.788	834.751	14.6714
8	Hu-2-08	314.317	0.238723	0.138421	0.00258863	1.28833	0.0435985	0.0675034	0.00190388	835.699	14.6579	840.558	19.3479	853.419	58.6271	99.4219	97.9236	835.699	14.6579
9	Hu-2-09	86.0807	0.377325	0.138739	0.00330234	1.31243	0.0552989	0.0686082	0.00238533	837.503	18.694	851.196	24.2863	887.055	71.9023	98.3913	94.4138	837.503	18.694
29	Hu-2-29	61.529	bd	0.14958	0.00259356	1.32387	0.0496724	0.0641903	0.00213587	898.579	14.5433	856.203	21.707	747.981	70.3526	104.949	120.134	898.579	14.5433
51	Hu-2-51	188.423	bd	0.152979	0.00234984	1.36758	0.0386	0.0648363	0.00153528	917.612	13.1377	875.125	16.5559	769.095	49.8819	104.855	119.311	917.612	13.1377
10	Hu-2-10	342.694	0.116819	0.1547	0.002766	1.4696	0.045531	0.0688978	0.00174326	927.227	15.4415	917.962	18.7223	895.753	52.2375	101.009	103.514	927.227	15.4415
64	Hu-2-64	324.415	bd	0.158829	0.005711	1.52561	0.0635363	0.0696648	0.00146382	950.236	31.7688	940.736	25.5491	918.555	43.2253	101.01	103.449	950.236	31.7688
67	Hu-2-67	142.999	0.441366	0.164207	0.00678345	1.57021	0.0752846	0.0693527	0.00168777	980.084	37.5603	958.508	29.7504	909.324	50.1347	102.251	107.782	980.084	37.5603
39	Hu-2-39	63.6698	0.690378	0.166087	0.00290128	1.59792	0.0520621	0.0697777	0.00191907	990.484	16.0385	969.396	20.351	921.893	56.5529	102.175	107.44	990.484	16.0385
31	Hu-2-31	224.583	0.460195	0.177505	0.00393976	1.81153	0.0595933	0.0740174	0.00179721	1053.3	21.5682	1049.63	21.5253	1042.02	49.0141	100.349	101.082	1053.3	21.5682
16	Hu-2-16	212.963	0.115312	0.456558	0.00651637	10.1778	0.28894	0.16168	0.00396771	2424.27	28.8393	2451.06	26.253	2473.37	41.4324	98.9068	98.0147	2473.37	41.4324
